# Supplementary material for: Control of STING Agonistic/Antagonistic Activity Using Amine-Skeleton-Based c-di-GMP Analogues
Source: MDPI journal article supplement (doi:10.3390/ijms23126847), 2022-06-20
Supplement: s1 [file s1]

## Supporting Information

### **Control of STING agonistic/antagonistic activity using amine skeleton-based c-di-GMP analogues**

Yuta Yanase,<sup>1,3</sup> Genichiro Tsuji,<sup>1\*</sup> Miki Nakamura,<sup>1,2</sup> Norihito Shibata,<sup>1</sup> and Yosuke Demizu<sup>\*,1,2,3</sup>

<sup>1</sup> *National Institute of Health Sciences, 3-25-26, Tonomachi, Kawasaki, Kanagawa, 210-9501, Japan*

<sup>2</sup> *Graduate School of Medicine Dentistry and Pharmaceutical Sciences, Division of Pharmaceutical Science of Okayama University, 1-1-1, Tsushimanaka, Kita, Okayama, 700-8530, Japan*

<sup>3</sup> *Graduate School of Medical Life Science, Yokohama City University, Yokohama, Kanagawa, 230-0045, Japan*

\* Correspondence: gtsuji@nihs.go.jp (G.T.); demizu@nihs.go.jp (Y.D.); Tel.: +81-44-270-6578

## Table of Contents

### Supplementary Results

|                 |    |
|-----------------|----|
| Figure S1 ..... | S4 |
| Figure S2 ..... | S4 |
| Figure S3 ..... | S3 |
| Table S1 .....  | S3 |
| Table S2 .....  | S4 |
| Figure S4 ..... | S4 |
| Figure S5 ..... | S5 |

### Experimental procedures

## Supplementary Results

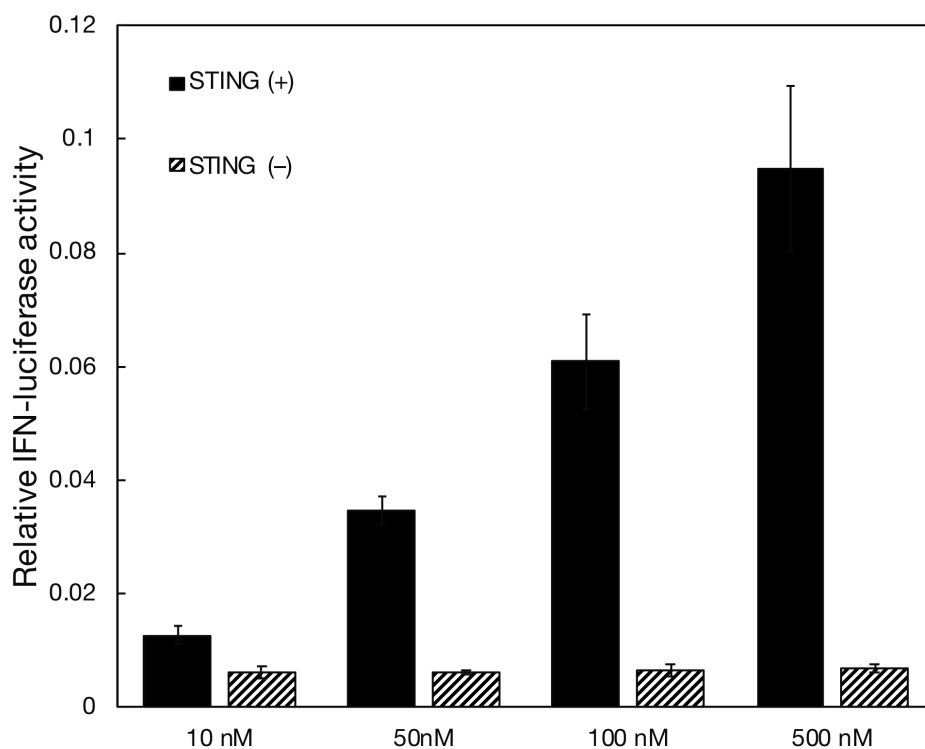

**Figure S1.** The evaluation of the IFN-β induction activity of cGAMP with/without STING transfection. HEK293T cells were transfected with vectors encoding Flag-STING or Flag-Empty as indicated, together with an IFN-luciferase reporter, and luciferase activity was measured 6 h after stimulation. Data are presented as mean ± SEM (*n* = 3).

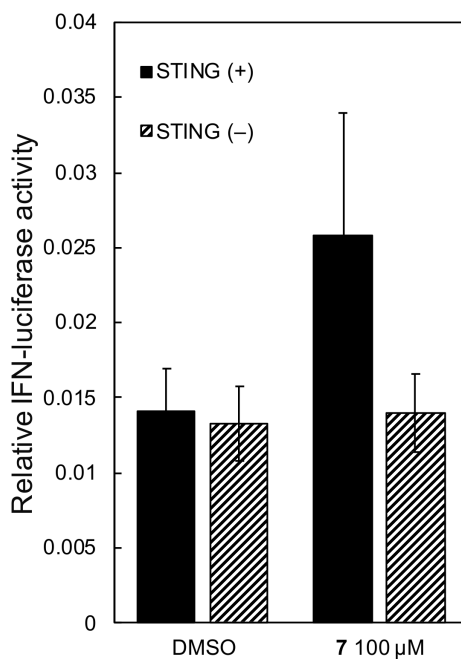

**Figure S2.** The evaluation of the IFN-β induction activity of **7** with/without STING transfection. HEK293T cells were transfected with vectors encoding Flag-STING or Flag-Empty as indicated, together with an IFN-luciferase reporter, and luciferase activity was measured 6 h after stimulation. Data are presented as mean ± SEM (*n* = 3).

**Table S1.** The evaluation of the IFN- $\beta$  induction activity of cGAMP and **amine skeleton compounds** with digitonin permeabilization. HEK293T cells were transfected with vectors encoding STING as indicated, together with an IFN-luciferase reporter, and luciferase activity was measured at 6 h after stimulation.

| Cpd. (100 $\mu$ M) | Agonistic Activity | Antagonistic Activity |
|--------------------|--------------------|-----------------------|
| DMSO (1%)          | 0.040              | N.A.                  |
| cGAMP (500 nM)     | 1.217              | N.A.                  |
| <b>7</b>           | 0.075              | 0.97                  |
| <b>9</b>           | 0.045              | 1.41                  |
| <b>11</b>          | 0.039              | 1.53                  |
| <b>12</b>          | 0.045              | 0.78                  |
| <b>13</b>          | 0.048              | 1.42                  |
| <b>14</b>          | 0.043              | 1.24                  |
| <b>16</b>          | 0.040              | 1.40                  |
| <b>17</b>          | 0.042              | 1.29                  |
| <b>21</b>          | 0.045              | 1.74                  |
| <b>26</b>          | 0.047              | 1.12                  |
| <b>28</b>          | 0.038              | 1.52                  |

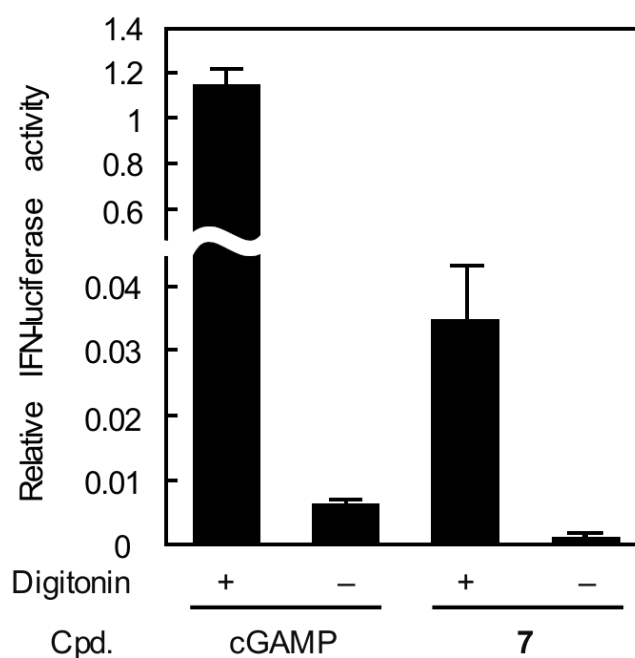

**Figure S3.** The evaluation of the IFN- $\beta$  induction activity of cGAMP and **7** with/without digitonin permeabilization. HEK293T cells were transfected with vectors encoding STING as indicated, together with an IFN-luciferase reporter, and luciferase activity was measured 6 h after stimulation. IFN-luciferase activities were standardized by subtract the DMSO-treated control as background. Data are presented as mean  $\pm$  SEM ( $n = 3$ ).

**Table S2.** The evaluation of the IFN- $\beta$  induction activity of cGAMP and **7** with/without digitonin permeabilization. HEK293T cells were transfected with vectors encoding STING as indicated, together with an IFN-luciferase reporter, and luciferase activity was measured 6 h after stimulation. IFN-luciferase activities were standardized by subtract the DMSO-treated control as background.

|                              | cGAMP  | Compound <b>7</b> |
|------------------------------|--------|-------------------|
| Digitonin -/+ <sup>[a]</sup> | 0.0056 | 0.037             |

[a] Relative value of luciferase activity of digitonin (-) to luciferase activity of digitonin (+)

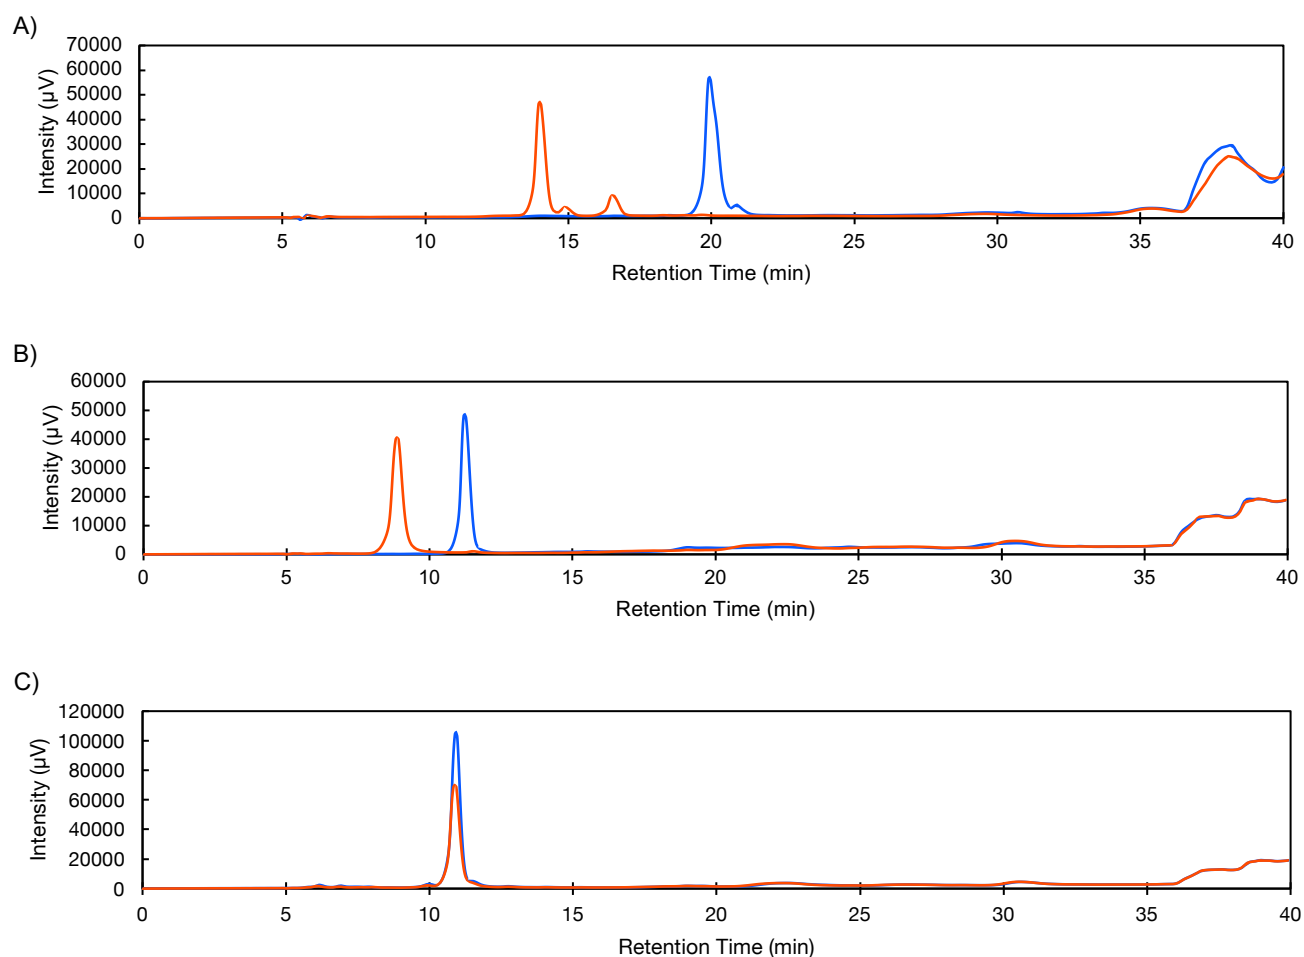

**Figure S4.** HPLC profile of the enzymatic digestion products of A) c-di-GMP, B) cGAMP, C) compound **7**. Red: NP1 (+), Blue: NP1(-).



## Experimental procedures

### Chemistry<sup>[S1]</sup>

#### General information

All chemicals were obtained from Sigma-Aldrich, FUJIFILM Wako Pure Chemical, Tokyo Chemical Industry Co., Ltd., and were used as received without further purification. TLC analysis, which was used to monitor the progress of reactions, was conducted using Merck silica gel 60 F254 pre-coated plates, visualizing with a 254/365 nm UV lamp and staining with iodine or ninhydrin. Column chromatography was performed using silica gel (spherical, neutral) purchased from Kanto Chemical or NH silica gel (CHROMATOREX NH-DM1020) purchased from Fuji Silysia, or medium pressure chromatography (Smart Flash; YAMAZEN) equipped with a Hi-Flash column and an Inject column (YAMAZEN). HPLC was performed using LC-2000Plus (JASCO). <sup>1</sup>H and <sup>13</sup>C NMR spectra were recorded on an ECZ 600R spectrometer (JEOL), and measurements were carried out using deuterated solvents. Chemical shift values (ppm) were calibrated using tetramethylsilane (TMS, 0.00 ppm) or residual non-deuterated solvent peaks as an internal reference (CDCl<sub>3</sub>: 7.26 for <sup>1</sup>H NMR, 77.0 for <sup>13</sup>C NMR; CD<sub>3</sub>OD: 3.30 for <sup>1</sup>H NMR, 49.0 for <sup>13</sup>C NMR; DMSO-*d*<sub>6</sub>: 2.50 for <sup>1</sup>H NMR, 39.5 for <sup>13</sup>C NMR). Signal splitting patterns are described as singlet (s), doublet (d), triplet (t), quartet (q), quintet (quint.), septet (sept.), double of doublets (dd), doublet of triplet (dt), multiplet (m), broad (br.). High-resolution mass spectrum (HRMS) were measured using a Shimadzu IT-TOF MS equipped with an electrospray ionization source in positive mode or negative mode.

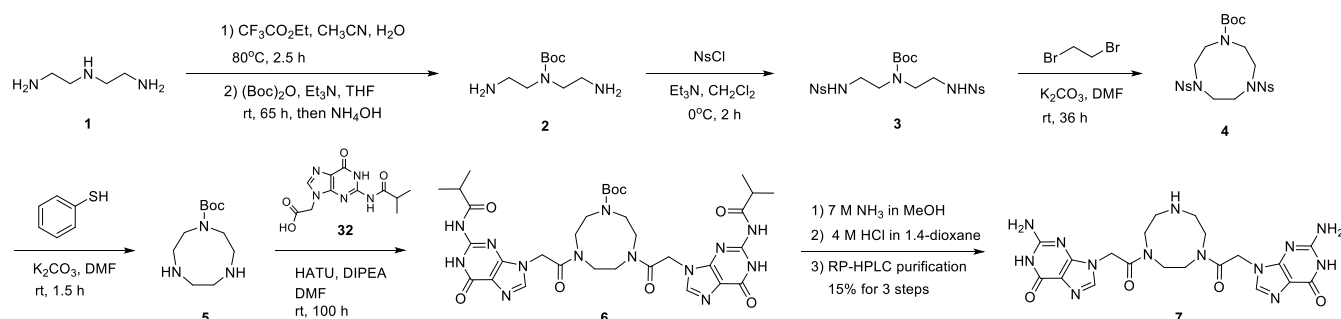

Scheme S1. Synthesis of compound 7

#### **tert-Butyl bis(2-(2,2,2-trifluoroacetamido)ethyl)carbamate (2)<sup>[S2]</sup>**

Diethylenetriamine (1.09 mL, 10 mmol) was dissolved in ACN (20 mL) containing water (200 µL). Ethyl trifluoroacetate (4.04 mL, 3.5 eq) was added to the solution, then the solution was refluxed for 14 h at 80°C. The solvents were removed under reduced pressure, the residue was added 1:1 ACN – Et<sub>2</sub>O (20 mL). The solvents were removed under reduced pressure, dried under vacuum. The resulting residue was dissolved in THF (7 mL). Et<sub>3</sub>N (2.09 mL, 1.5 eq) and (Boc)<sub>2</sub>O (3.31 g, 1.5 eq) in THF (3 mL) was added dropwise into the solution under stirring at 0°C. The mixture was stirred over weekend at rt. Almost solvents were removed under reduced pressure. The resulting residue was dissolved in 28% NH<sub>4</sub>OH (10 mL) and MeOH (5 mL), stirred over weekend at 50°C. The reaction mixture was concentrated under reduced pressure, purified by flash silica gel column chromatography ( $\phi$  = 42 mm, h = 145 mm, CH<sub>2</sub>Cl<sub>2</sub>/MeOH/28% NH<sub>4</sub>OH = 20:5:1) to afford a pale yellowish oil including 2 (4.63 g). This oil was used next reaction without further purification.

<sup>1</sup>H NMR (600 MHz, DMSO-*d*<sub>6</sub>)  $\delta$  7.77 (br.s, 4H), 2.92 (t, *J* = 7.5 Hz, 4H), 1.41 (s, 9H). ESI-HRMS calcd for C<sub>9</sub>H<sub>22</sub>N<sub>3</sub>O<sub>2</sub> [M+H]<sup>+</sup>: 204.1707, found: 204.1716.

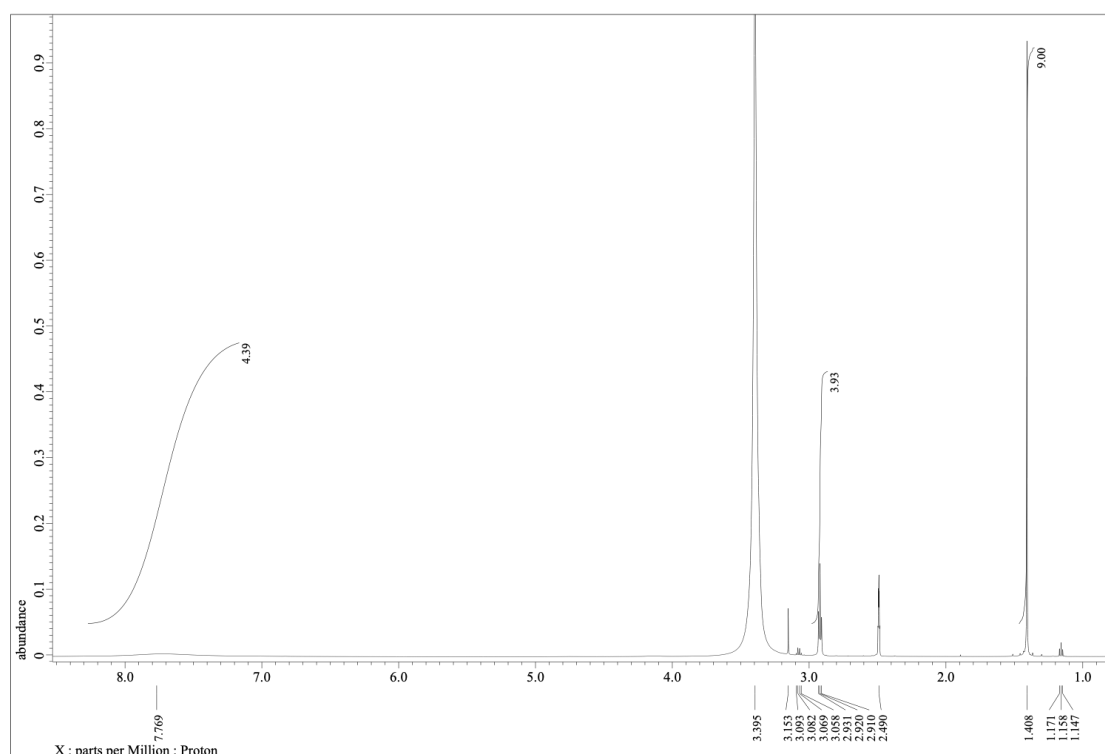

<sup>1</sup>H NMR spectrum of **2**

**tert-Butyl bis(2-(2-nitrophenylsulfonamido)ethyl)carbamate (**3**)**

The oil including **2** (203 mg) was dissolved in CH<sub>2</sub>Cl<sub>2</sub> (5 mL), added Et<sub>3</sub>N (613 μL, 4.4 eq) at rt. 2-Nitrobenzensulfonyl chloride (487.5 mg, 2.2 eq) was added into the mixture under stirring at 0°C, the mixture was continue stirring for 2 h at 0°C. The reaction mixture was diluted with CH<sub>2</sub>Cl<sub>2</sub>, washed with KHSO<sub>4</sub> aq. (2 M), brine. The organic layer was dried over Na<sub>2</sub>SO<sub>4</sub>, filtered, concentrated under reduced pressure. The residue was purified by flash silica gel column chromatography (Yamazen inject column size: M, Yamazen Hi-flash column size: M, CH<sub>2</sub>Cl<sub>2</sub>/MeOH = 100:0 to 97:3) to afford **3** (169 mg, 0.3 mmol, 68% yield for 4 steps) as a white foam solid.

<sup>1</sup>H NMR (600 MHz, DMSO-*d*<sub>6</sub>) δ 8.13 (dt, *J* = 5.7 Hz, 24 Hz, 2H), 7.94-7.97 (m, 4H), 7.84-7.86 (m, 4H), 3.17 (d, *J* = 6.6 Hz, 4H), 2.98 (q, *J* = 6.6 Hz, 4H), 1.33 (s, 9H). ESI-HRMS calcd for C<sub>21</sub>H<sub>28</sub>N<sub>5</sub>O<sub>10</sub>S<sub>2</sub> [M-H]<sup>-</sup>: 572.1126, found: 572.1082.



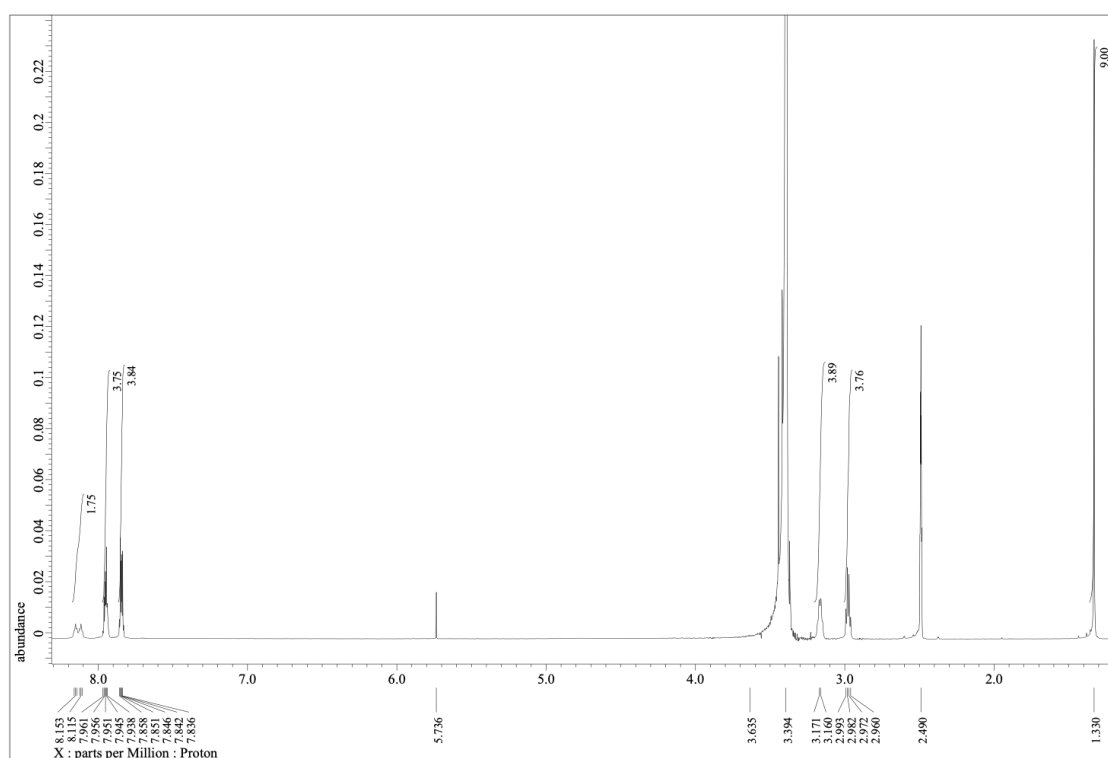

<sup>1</sup>H NMR spectrum of **3**

**tert-Butyl 4,7-bis((2-nitrophenyl)sulfonyl)-1,4,7-triazonane-1-carboxylate (**4**)**

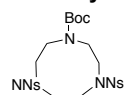

Compound **3** (229 mg, 0.4 mmol) was dissolved in DMF (1 mL), added K<sub>2</sub>CO<sub>3</sub> (110 mg, 2 eq) at rt then stirred at 0°C. 1,2-dibromoethane (75 mg, 1 eq) in DMF (1 mL) was added dropwise into the mixture at 0°C. The mixture was stirred for overnight at rt. K<sub>2</sub>CO<sub>3</sub> (55 mg, 1 eq) and 1,2-dibromoethane (75 mg, 1 eq) was added into the mixture, stirred for over weekend. The reaction mixture was diluted with EtOAc, washed with HCl (2 M) twice, sat. aq. NaHCO<sub>3</sub>, brine. The organic layer was dried over Na<sub>2</sub>SO<sub>4</sub>, filtered, concentrated under reduced pressure. The residue was purified by NH silica gel column chromatography ( $\phi$  = 15 mm, h = 105 mm, CH<sub>2</sub>Cl<sub>2</sub>/MeOH = 100:0 to 98:2) to afford **4** (150 mg, 0.25 mmol, 63% yield) as a pale yellow foam.

<sup>1</sup>H NMR (600 MHz, CDCl<sub>3</sub>)  $\delta$  7.62-8.05 (m, 8H), 3.27-3.73 (br.m, 12H), 1.44-1.50 (m, 9H); <sup>13</sup>C NMR (151 MHz, CDCl<sub>3</sub>)  $\delta$  155.5, 148.6, 148.6, 134.0, 133.9, 131.8, 131.7, 130.6, 130.5, 124.2, 80.8, 53.4, 52.7, 51.7, 51.3, 50.9, 45.7, 28.3. ESI-HRMS calcd for C<sub>11</sub>H<sub>22</sub>NO<sub>2</sub> [M-H]<sup>-</sup>: 598.1283, found: 598.1246.

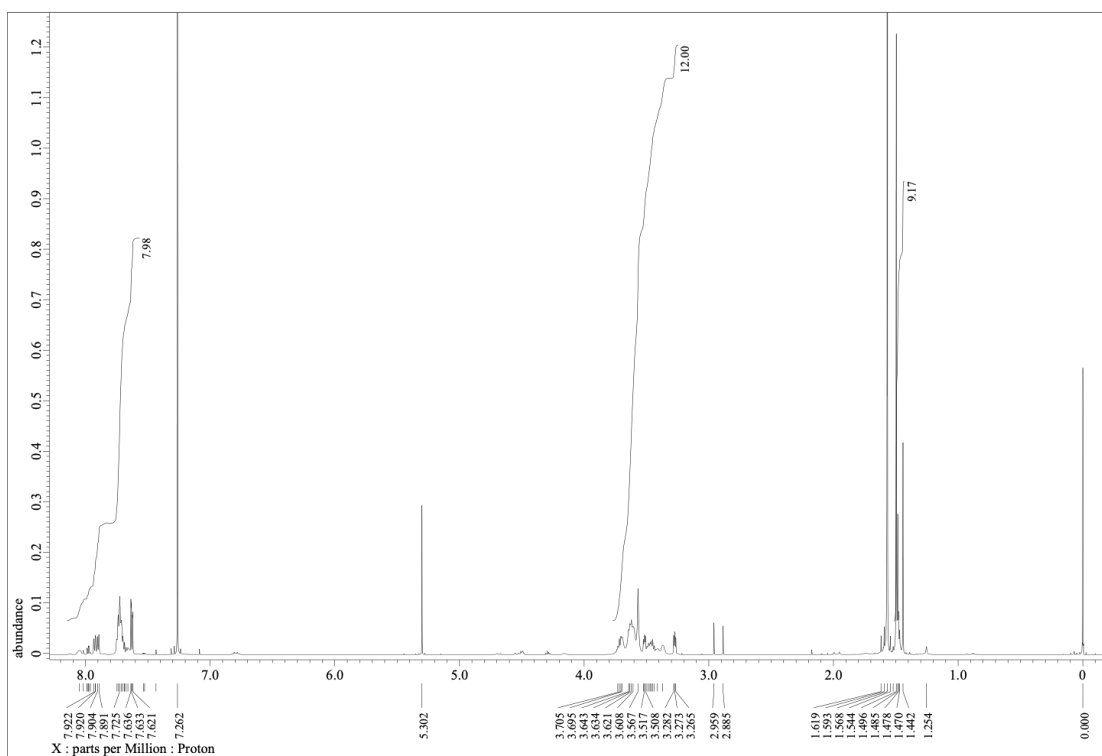

<sup>1</sup>H NMR spectrum of **4**

***tert*-Butyl 1,4,7-triazonane-1-carboxylate (**5**)**

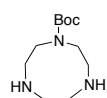

Compound **4** (150 mg, 0.25 mmol) was dissolved in DMF (1.2 mL), added K<sub>2</sub>CO<sub>3</sub> (111 mg, 3.2 eq) at rt then stirred at 0°C. Thiophenol (82 µL, 3.2 eq) was added into the mixture at 0°C, stirred for 1.5 h at rt. The reaction mixture was diluted with CH<sub>2</sub>Cl<sub>2</sub>, filtered, concentrated under reduced pressure, dried under vacuum. The residue was purified by NH silica gel column chromatography ( $\phi$  = 25 mm, h = 70 mm, CH<sub>2</sub>Cl<sub>2</sub>/MeOH = 100:0 to 92:8) to afford **5** (47.4 mg, 0.21 mmol, 82% yield) as a yellow foam.

<sup>1</sup>H NMR (600 MHz, CDCl<sub>3</sub>)  $\delta$  4.29-2.70 (m, 12H), 1.49-1.43 (m, 9H). ESI-HRMS calcd for C<sub>11</sub>H<sub>24</sub>N<sub>3</sub>O<sub>2</sub> [M+H]<sup>+</sup>: 230.1863, found: 230.1863.

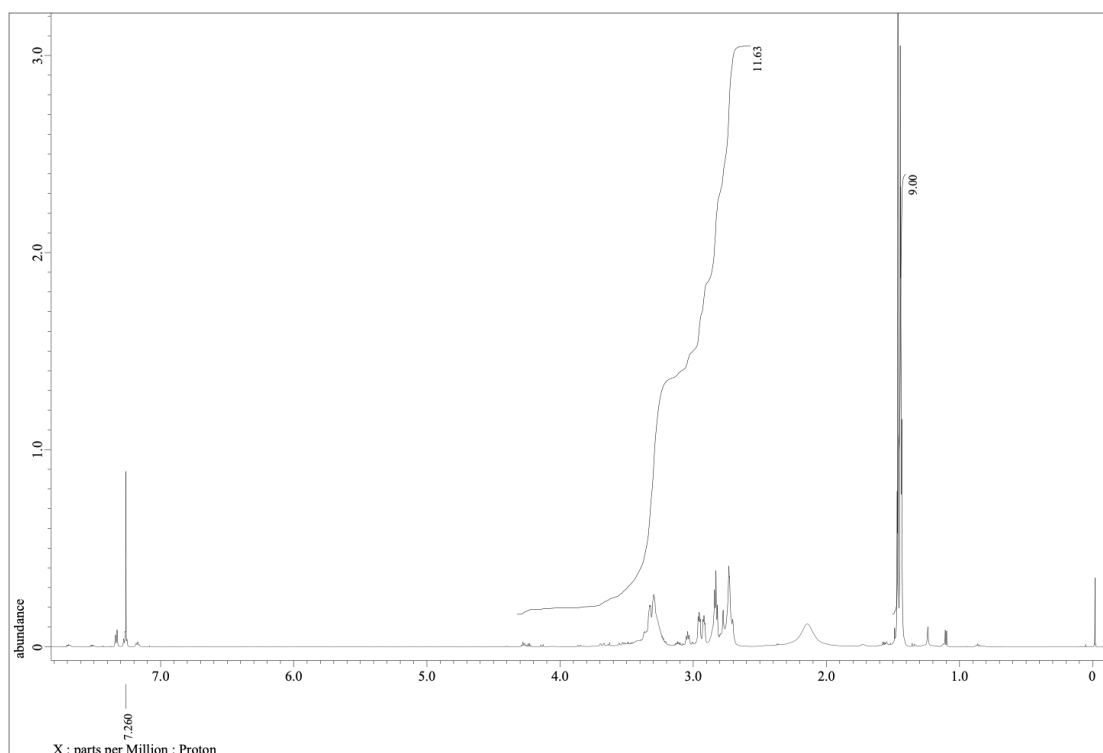

<sup>1</sup>H NMR spectrum of **5**

**2-Amino-9-(2-(4-(2-(2-amino-6-oxo-1*H*-purin-9(6*H*)-yl)acetyl)-1,4,7-triazonan-1-yl)ethyl)-1*H*-purin-6(9*H*)-one (**7**)**

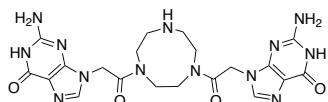

Compound **5** (47.4 mg, 0.21 mmol) was dissolved in DMF (1 mL) and stirred at 0°C. Compound **32** (126 mg, 2.2 eq), HATU (236 mg, 3 eq) and DIPEA (216 µL, 6 eq) was added into the above mixture, stirred for over weekend at rt. The reaction mixture was concentrated under reduced pressure.

The resulting residue was added NH<sub>3</sub> in MeOH (7 M, 1 mL), stirred for overnight at rt. The mixture was added additional NH<sub>3</sub> in MeOH (7 M, 2 mL), stirred for over weekend at rt. The reaction mixture was concentrated under reduced pressure, dried under vacuum.

The resulting residue was added HCl in 1,4-dioxane (4 M, 3 mL), stirred for 2 h at rt. The reaction mixture was concentrated under reduced pressure, the residue was dried by codistillation with MeOH twice. The residue was purified by HPLC (LC-2000Plus (JASCO); Discovery BIO Wide Pore C18 HPLC Column (Supelco), 21.2 × 250 mm; Flow rate: 10 mL/min; 40°C; Mobile phase A: 0.1% TFA in H<sub>2</sub>O, B: 0.1% TFA in ACN; Gradient: B 0% to 10 % (20 min); Detection: 260 nm) to afford **7** (15.8 mg, 0.031 mmol, 14.7% yield for 3 steps) as a white solid.

<sup>1</sup>H NMR (600 MHz, DMSO-*d*<sub>6</sub>) δ 10.18-10.05 (m, 2H), 7.30-7.22 (m, 2H), 6.01-5.56 (m, 4H), 4.12 (s, 1H), 4.02 (s, 1H), 3.94 (s, 1H), 3.83 (s, 1H), 2.74-2.56 (m, 2H), 2.46 (s, 2H), 2.20-2.13 (m, 4H), 2.02 (s, 1H); <sup>13</sup>C NMR (151 MHz, DMSO-*d*<sub>6</sub>) δ 167.6, 167.4, 166.1, 158.9, 158.7, 158.4, 158.2, 155.2, 155.0, 154.9, 154.8, 154.6, 150.9, 150.8, 150.7, 150.7, 150.6, 138.7, 138.5, 138.4, 118.5, 116.6, 114.7, 112.7, 110.5, 46.4, 46.0, 45.3, 45.2, 43.6, 43.4. ESI-HRMS calcd for C<sub>20</sub>H<sub>26</sub>N<sub>13</sub>O<sub>4</sub> [M+H]<sup>+</sup>: 512.2225, found: 512.2253.

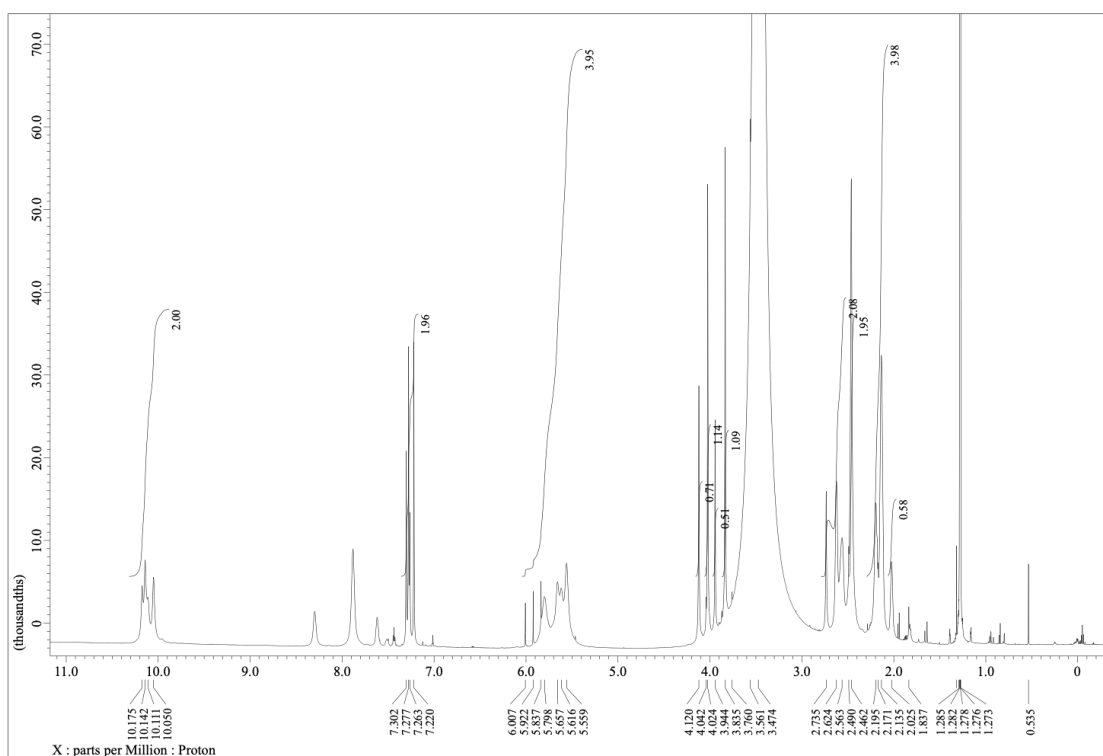

<sup>1</sup>H NMR spectrum of 7

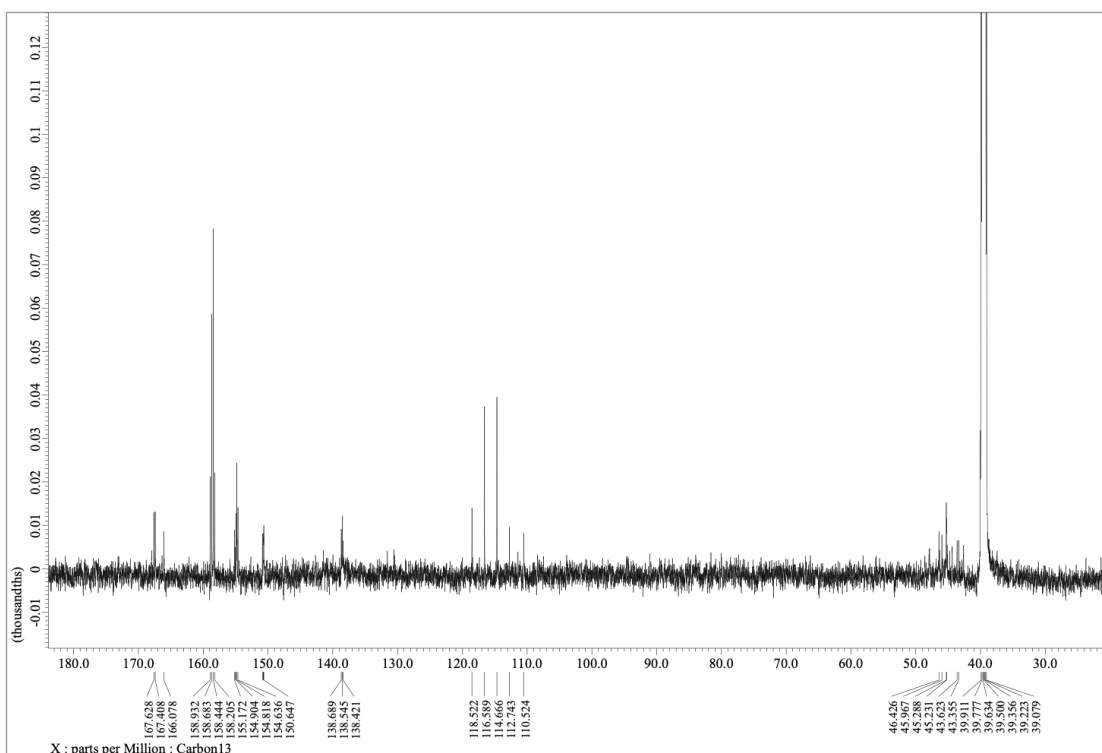

<sup>13</sup>C NMR spectrum of 7

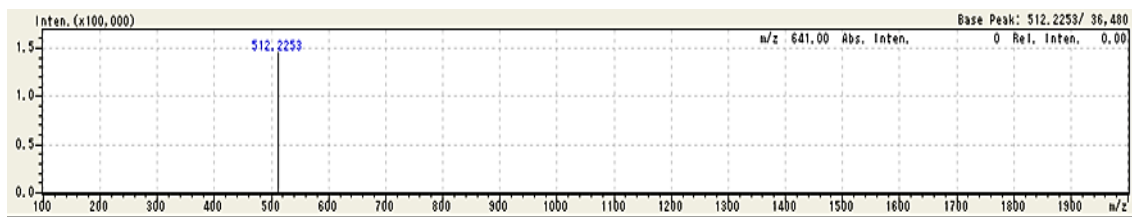

ESI-MS spectrum of **7**

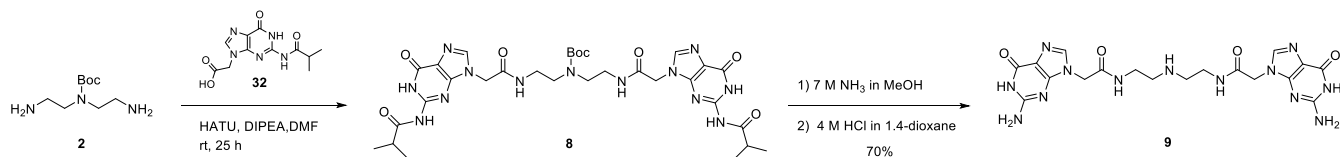

Scheme S2. Synthesis of compound **9**

**tert-Butyl bis(2-(2-(2-isobutyramido-6-oxo-1H-purin-9(6H)-yl)acetamido) ethyl)carbamate (**8**)**

The oil including **2** (203 mg) was dissolved in DMF (5 mL) and stirred at 0°C. Compound **32** (614 mg, 2.2 eq), HATU (1.14 g, 3 eq) and DIPEA (1 mL, 6 eq) was added into the mixture, stirred for 23 h at rt. The reaction mixture was diluted with EtOAc, washed with HCl (1 M), brine. The aqueous layer was extracted 3 times with CH<sub>2</sub>Cl<sub>2</sub>. The organic layers were dried over Na<sub>2</sub>SO<sub>4</sub>, filtered, concentrated under reduced pressure, dried under vacuum. The crude mixture was absorbed on silica gel (Yamazen inject column size: M, h = 2 cm).

Purified by flash silica gel column chromatography (Yamazen Hi-flash column size: M, CH<sub>2</sub>Cl<sub>2</sub>/MeOH = 99:1 to 50:50) to afford **8** (117 mg, 0.16 mmol, 37% yield for 4 steps) as a pale yellow foam solid.

<sup>1</sup>H NMR (600 MHz, CD<sub>3</sub>OD) δ 8.30 (br.s, 1H), 7.99 (s, 2H), 3.42-3.31 (br.m, 8H), 2.66 (br.s, 2H), 1.46 (s, 9H), 1.18 (d, J = 6.9 Hz, 12H); <sup>13</sup>C NMR (151 MHz, CD<sub>3</sub>OD) δ 181.7, 168.9, 157.6, 151.2, 149.7, 142.3, 120.7, 81.7, 39.6, 36.9, 28.8, 19.3. ESI-HRMS calcd for C<sub>31</sub>H<sub>44</sub>N<sub>13</sub>O<sub>8</sub> [M+H]<sup>+</sup>: 726.3430, found: 726.3423.

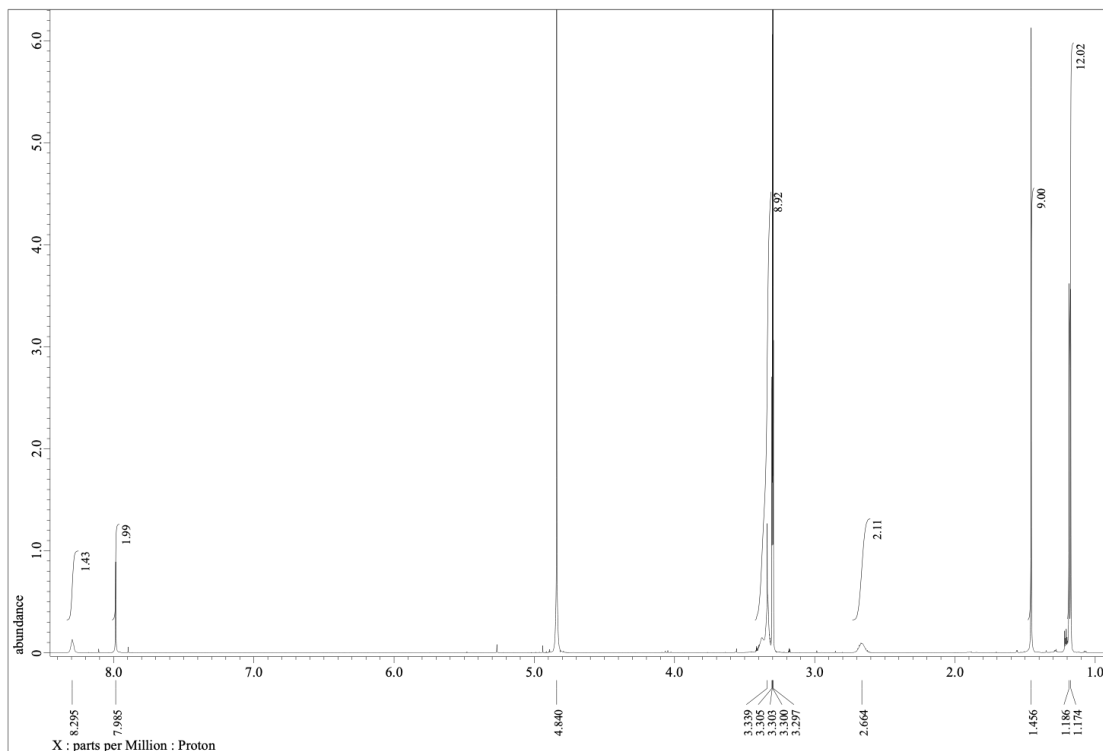

<sup>1</sup>H NMR spectrum of **8**

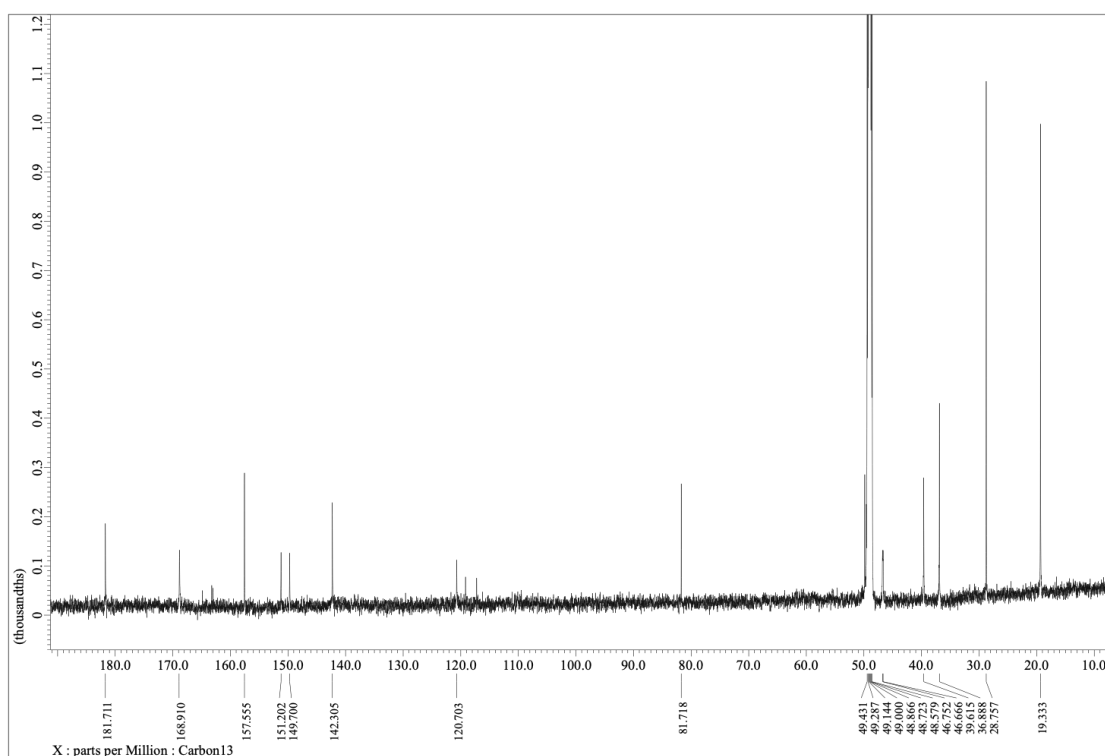

<sup>13</sup>C NMR spectrum of **8**

***N,N'*-(Azanediylobis(ethane-2,1-diyl))bis(2-(2-amino-6-oxo-1*H*-purin-9(6*H*)-yl)acetamide) (**9**)**

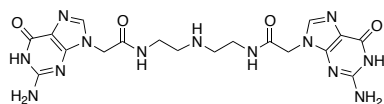

Compound **8** (10 mg, 0.014 mmol) was dissolved in NH<sub>3</sub> in MeOH (7 M, 1 mL), stirred over weekend at rt. The resulting precipitate was collected by centrifugation, washed with ACN, dried under vacuum.

The residue was added HCl in 1,4-dioxane (4 M, 1 mL), stirred for 2 h at rt. The reaction mixture was concentrated under reduced pressure and the residue was dried by codistillation with MeOH to afford **9** (5.8 mg, 9.8 μmol, 70% yield) as a pale yellow solid.

<sup>1</sup>H NMR (600 MHz, DMSO-*d*<sub>6</sub>) δ 11.49 (s, 2H), 9.31 (s, 2H), 8.84 (t, *J* = 5.5 Hz, 2H), 8.78 (s, 2H), 7.13 (s, 4H), 4.85 (s, 4H), 3.49-3.44 (m, 4H), 3.04 (t, *J* = 5.9 Hz, 4H); <sup>13</sup>C NMR (151 MHz, DMSO-*d*<sub>6</sub>) δ 166.0, 155.1, 154.4, 150.4, 138.2, 131.6, 128.7, 109.8, 94.7, 72.2, 70.5, 70.5, 69.6, 66.4, 60.2, 48.6, 45.9, 45.8, 43.6, 35.3. ESI-HRMS calcd for C<sub>18</sub>H<sub>24</sub>N<sub>13</sub>O<sub>4</sub> [M+2H]<sup>2+</sup>: 243.6071, found: 243.6134.

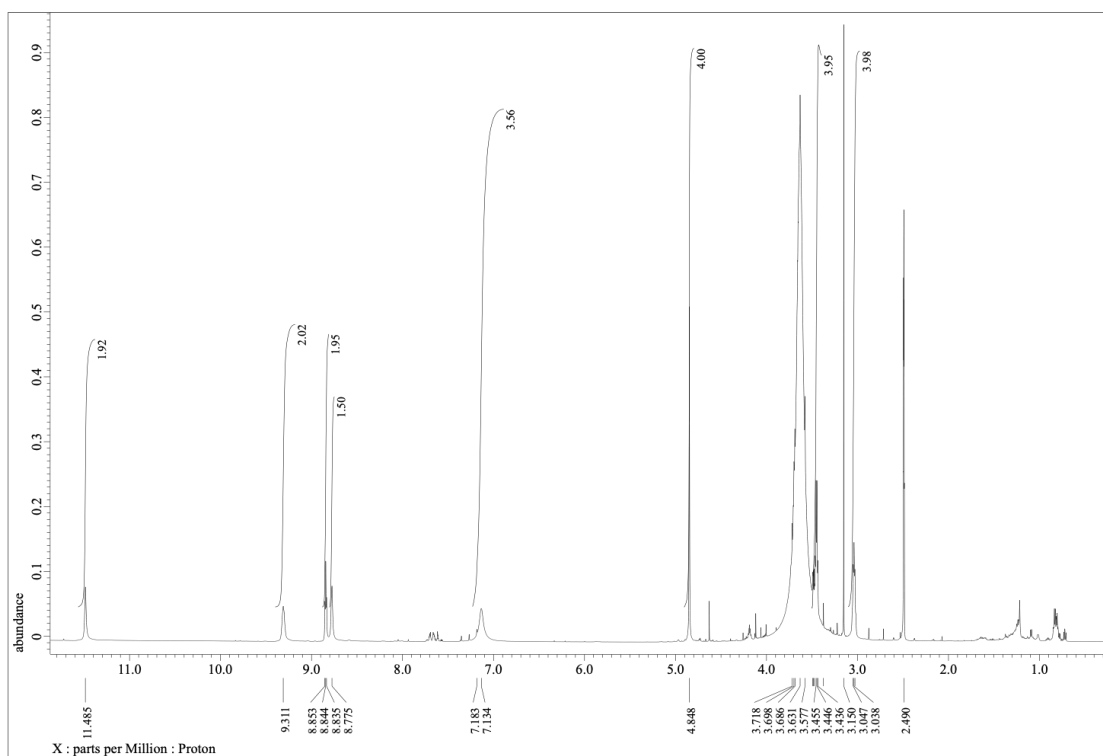

<sup>1</sup>H NMR spectrum of **9**

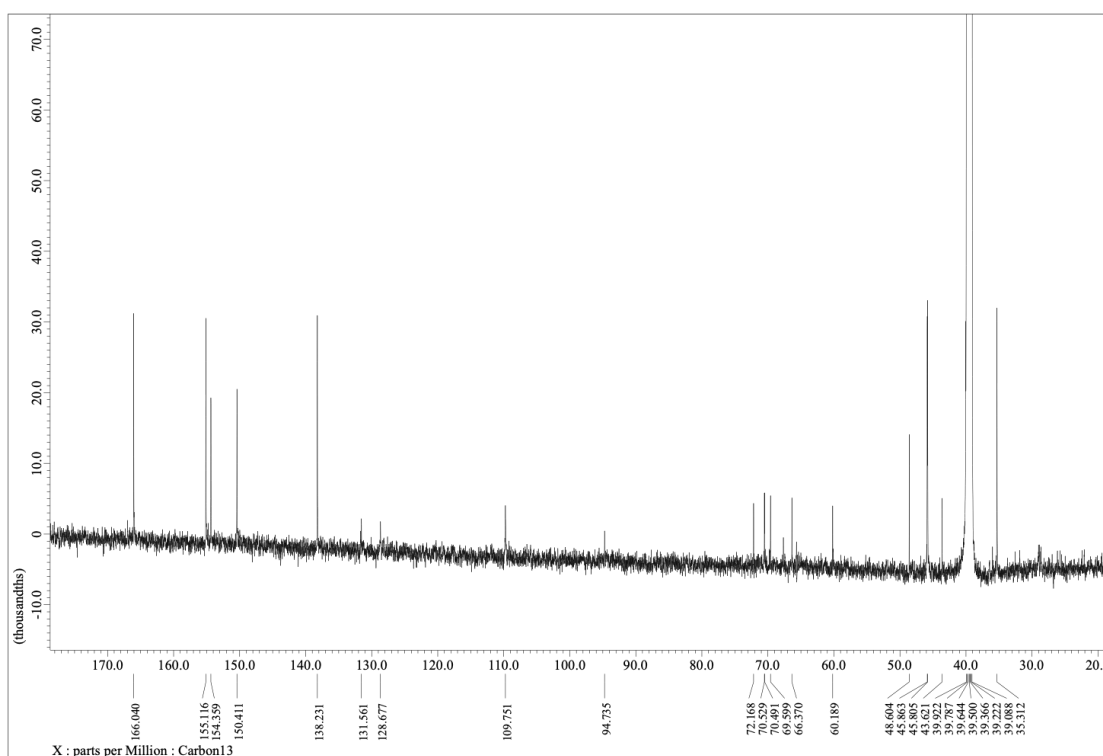

<sup>13</sup>C NMR spectrum of **9**

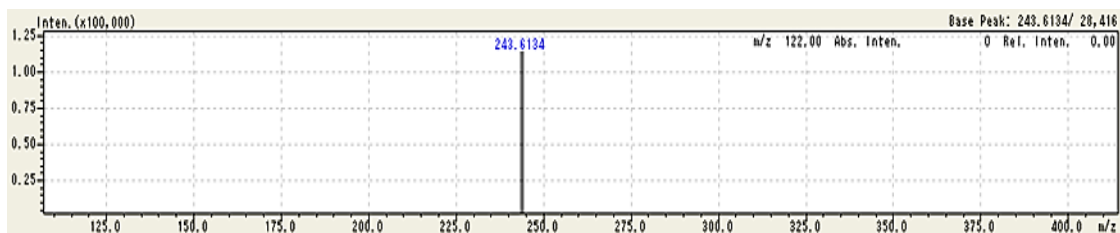

ESI-MS chromatogram of **9**

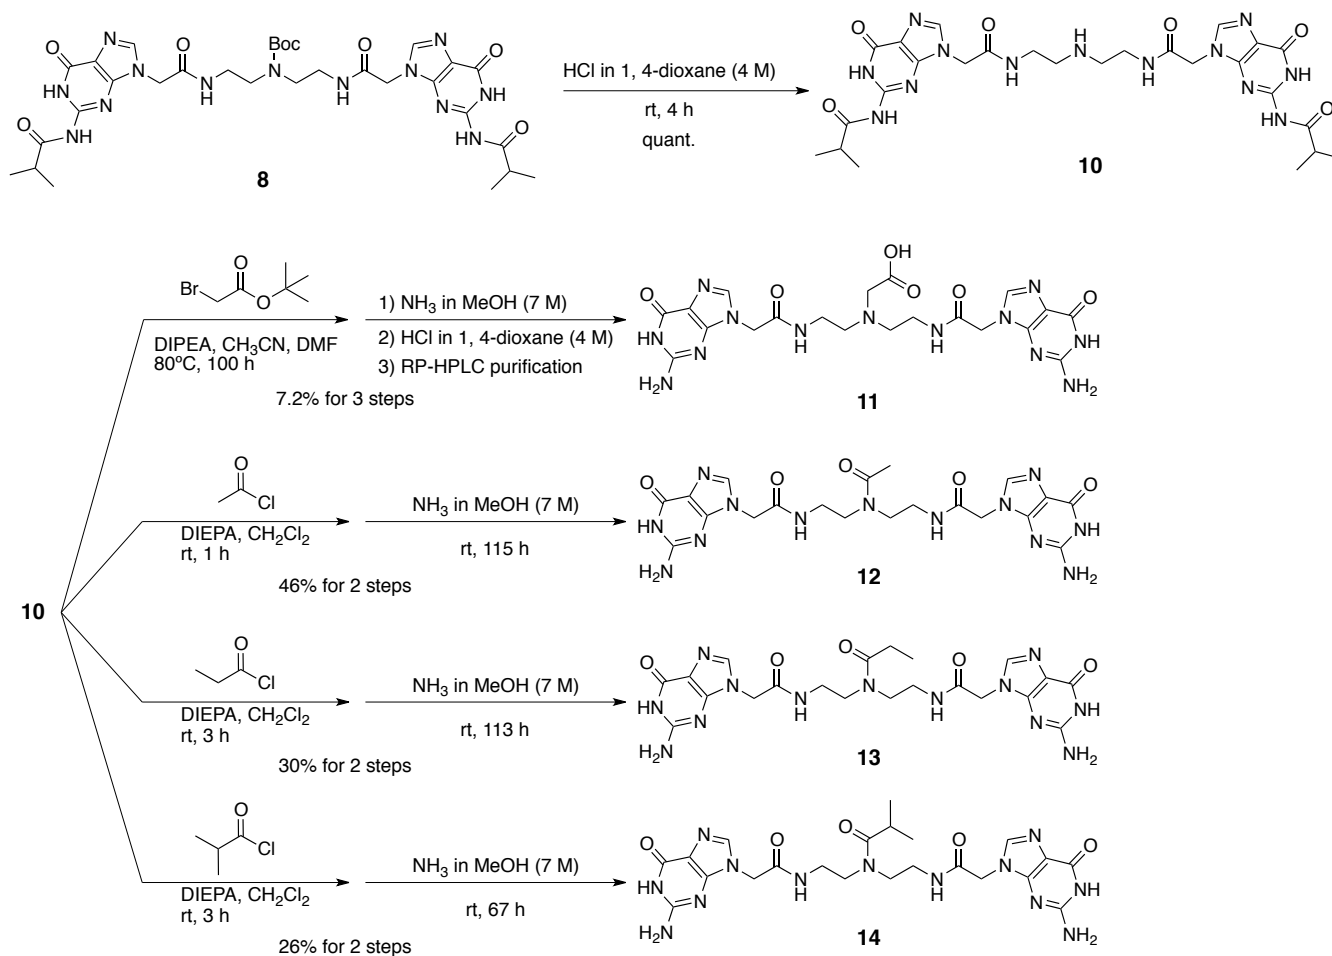

Scheme S3. Synthesis of compounds **11**, **12**, **13** and **14**

***N,N'*-(9,9'-(((Azanediylobis(ethane-2,1-diyl))bis(azanediylobis(2-oxoethane-2,1-diyl))bis(6-oxo-6,9-dihydro-1*H*-purine-9,2-diyl))bis(2-methylpropanamide) (**10**))**

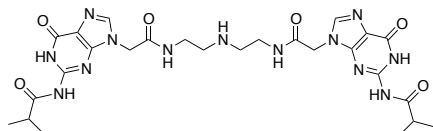

Compound **8** (63 mg, 0.087 mmol) was dissolved in HCl in 1,4-dioxane (4 M, 10 mL), stirred for 1.5 h at rt. The reaction mixture was concentrated under reduced pressure and the residue was dried by codistillation with MeOH to afford **10** (59.7 mg, 0.090 mmol, quant.) as a yellow solid.

$^1\text{H}$  NMR (600 MHz,  $\text{CD}_3\text{OD}$ )  $\delta$  8.93 (s, 2H), 5.08 (s, 3H), 3.73 (t,  $J = 5.9$  Hz, 3H), 3.67-3.64 (m, 7H), 3.60 (t,  $J = 5.5$  Hz, 3H), 3.58-3.56 (m, 3H), 3.24 (t,  $J = 5.5$  Hz, 3H), 2.71 (sept.,  $J = 6.7$  Hz, 2H), 1.22 (d,  $J = 6.9$  Hz, 12H). ESI-HRMS calcd for  $\text{C}_{26}\text{H}_{36}\text{N}_{13}\text{O}_6$   $[\text{M}+\text{H}]^+$ : 626.2906, found: 626.2862.



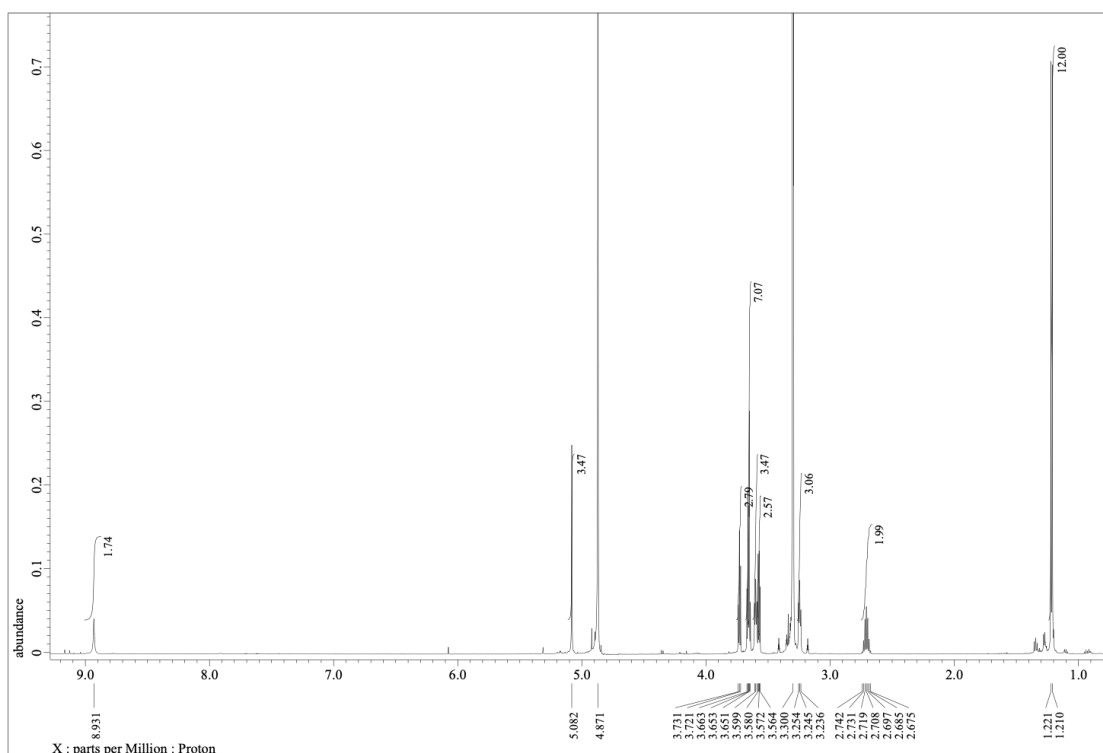

<sup>1</sup>H NMR spectrum of **10**

**2-(Bis(2-(2-(2-amino-6-oxo-1*H*-purin-9(6*H*)-yl)acetamido)ethyl)amino) acetic acid (11)**

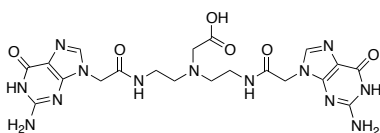

Compound **10** (91 mg, 0.14 mmol) was dissolved in ACN (1.4 mL) and DMF (1.4 mL), then stirred at rt. DIPEA (141  $\mu$ L, 5.8 eq) and *tert*-butyl 2-bromoisobutyrate (50  $\mu$ L, 2.4 eq) was added into the mixture, stirred for over weekend at 80°C. The reaction mixture was concentrated under reduced pressure, diluted with EtOAc, washed with HCl (1 M), sat. NaHSO<sub>4</sub> aq., brine. The combined aqueous layers were concentrated under reduced pressure, dried by codistillation with ACN. The residue was added NH<sub>3</sub> in MeOH (7 M, 10 mL), stirred for overnight at 40°C. The reaction mixture was concentrated under reduced pressure. The residue was added HCl in 1,4-dioxane (4 M, 10 mL), stirred for 5 h at rt. The reaction mixture was concentrated under reduced pressure, the residue was dried by codistillation with ACN. The residue was purified by HPLC (LC-2000Plus (JASCO); Discovery BIO Wide Pore C18 HPLC Column (Supelco), 21.2  $\times$  250 mm, 10  $\mu$ m; Flow rate: 10 mL/min; rt; Mobile phase A: 0.1% TFA in H<sub>2</sub>O, B: 0.1% TFA in ACN; Gradient: B 0% to 30 % (20 min); Detection: 260 nm) to afford **11** (8.5 mg, 0.016 mmol, 7.2% yield for 3 steps) as a pale yellow solid.

<sup>1</sup>H NMR (600 MHz, DMSO-*d*<sub>6</sub>) δ 10.87 (s, 2H), 8.42 (s, 2H), 7.95 (s, 2H), 6.62 (s, 4H), 4.68 (s, 4H), 3.98 (br. s, 2H), 3.39 (br. d, *J* = 5.5 Hz, 4H), 3.13 (s, 4H); <sup>13</sup>C NMR (151 MHz, DMSO-*d*<sub>6</sub>) δ 167.0, 158.6, 158.4, 158.1, 157.9, 155.9, 154.1, 151.1, 138.2, 56.0, 53.8, 52.6, 45.7, 45.1, 18.7. ESI-HRMS calcd for C<sub>20</sub>H<sub>26</sub>N<sub>13</sub>O<sub>6</sub> [M+H]<sup>+</sup>: 544.2124, found: 544.2074.

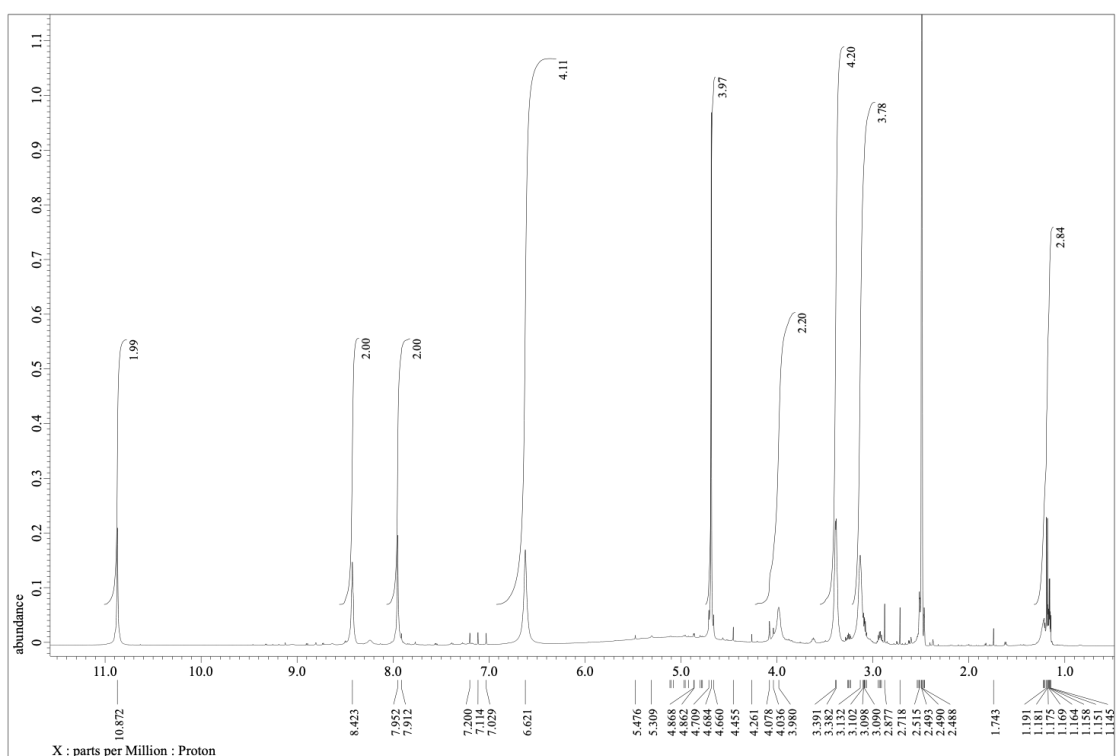

<sup>1</sup>H NMR spectrum of **11**

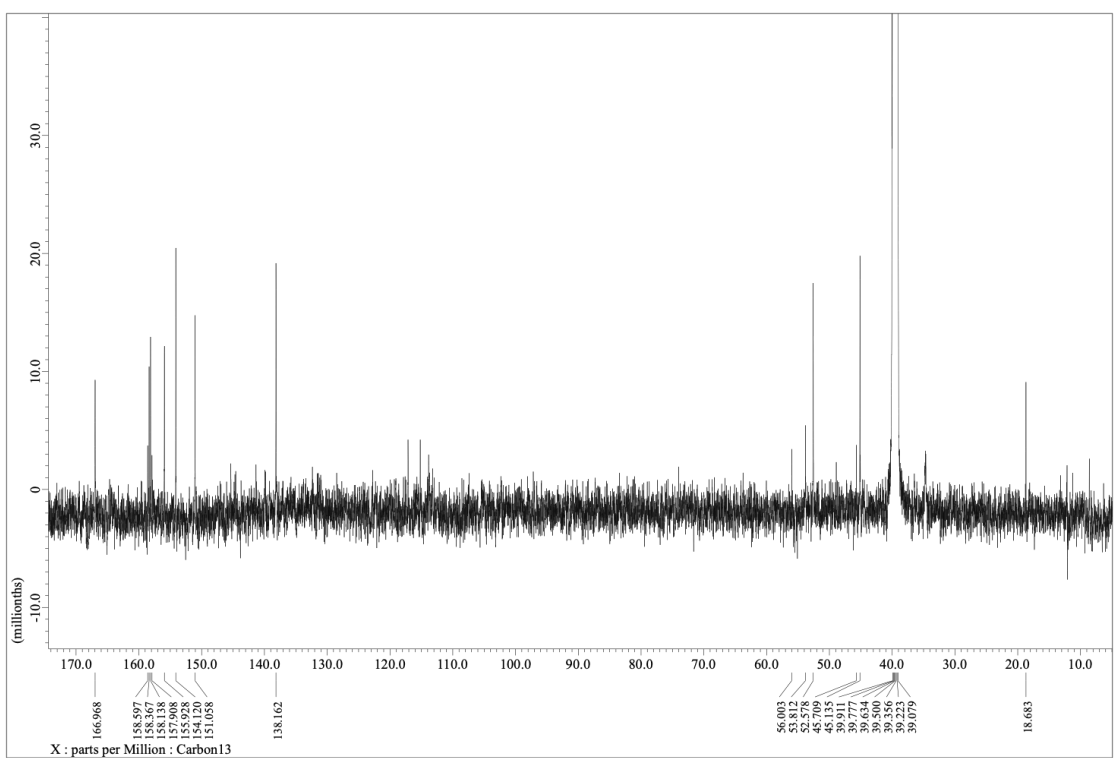

<sup>13</sup>C NMR spectrum of **11**

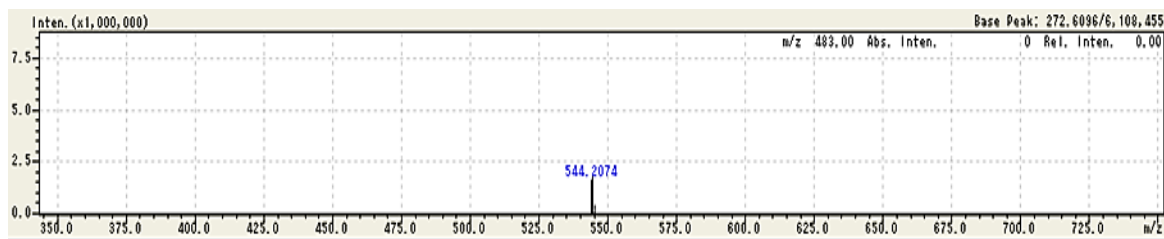

ESI-MS chromatogram of **11**

**2-(2-Amino-6-oxo-1*H*-purin-9(6*H*)-yl)-*N*-(2-(*N*-(2-(2-amino-6-oxo-1*H*-purin-9(6*H*)-yl)acetamido)ethyl)acetamido)ethyl)acetamide (**12**)**

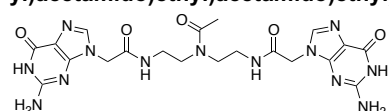

Compound **10** (72 mg, 0.1 mmol) was dissolved in CH<sub>2</sub>Cl<sub>2</sub> (1 mL) and DIPEA (95  $\mu$ L, 5 eq), then stirred at 0°C. Acetyl chloride (16  $\mu$ L, 2 eq) was added into the mixture, stirred for 1.5 h at rt. The reaction mixture was concentrated under reduced pressure, dried under vacuum. The residue was added NH<sub>3</sub> in MeOH (7 M, 10 mL), stirred over weekend at rt, added additional NH<sub>3</sub> in MeOH (7 M, 5 mL), stirred for 6 h at 40°C. The reaction mixture was concentrated under reduced pressure. The residue was added NH<sub>3</sub> in MeOH (7 M, 15 mL), stirred for 23 h at 50°C. The reaction mixture was concentrated under reduced pressure. The residue was added MeOH, filtered, washed with MeOH, dried under vacuum to afford **12** (24.1 mg, 0.046 mmol, 46% yield for 2 steps) as a white solid.

<sup>1</sup>H NMR (600 MHz, DMSO-*d*<sub>6</sub>)  $\delta$  8.23 (dt, *J* = 51.6, 5.5 Hz, 2H), 7.58 (d, *J* = 1.4 Hz, 2H), 6.42 (d, *J* = 6.2 Hz, 4H), 4.59 (d, *J* = 19.3 Hz, 4H), 3.30-3.16 (m, 4H), 1.97 (s, 3H); <sup>13</sup>C NMR (151 MHz, DMSO-*d*<sub>6</sub>)  $\delta$  170.3, 167.0, 166.7, 156.9, 153.6, 151.5, 138.3, 138.2, 116.2, 116.2, 47.8, 44.9, 44.9, 44.7, 37.5, 36.8, 21.3. ESI-HRMS calcd for C<sub>20</sub>H<sub>26</sub>N<sub>13</sub>O<sub>5</sub> [M+H]<sup>+</sup>: 528.2174, found: 528.2299.

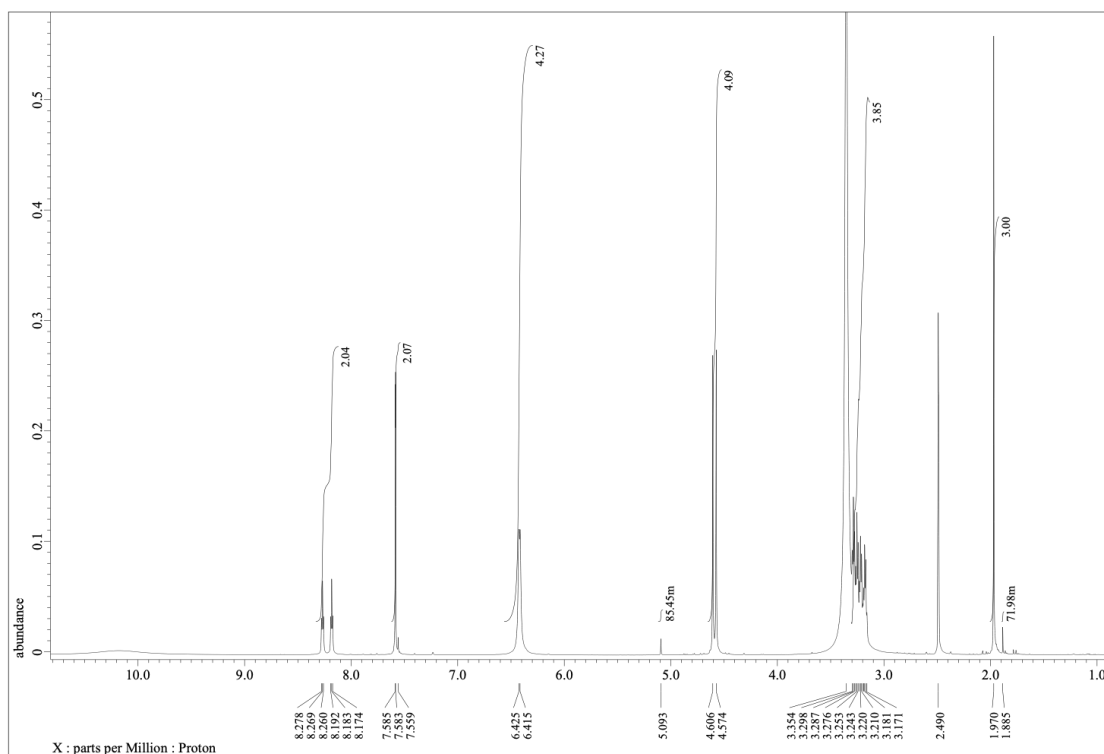

<sup>1</sup>H NMR spectrum of **12**

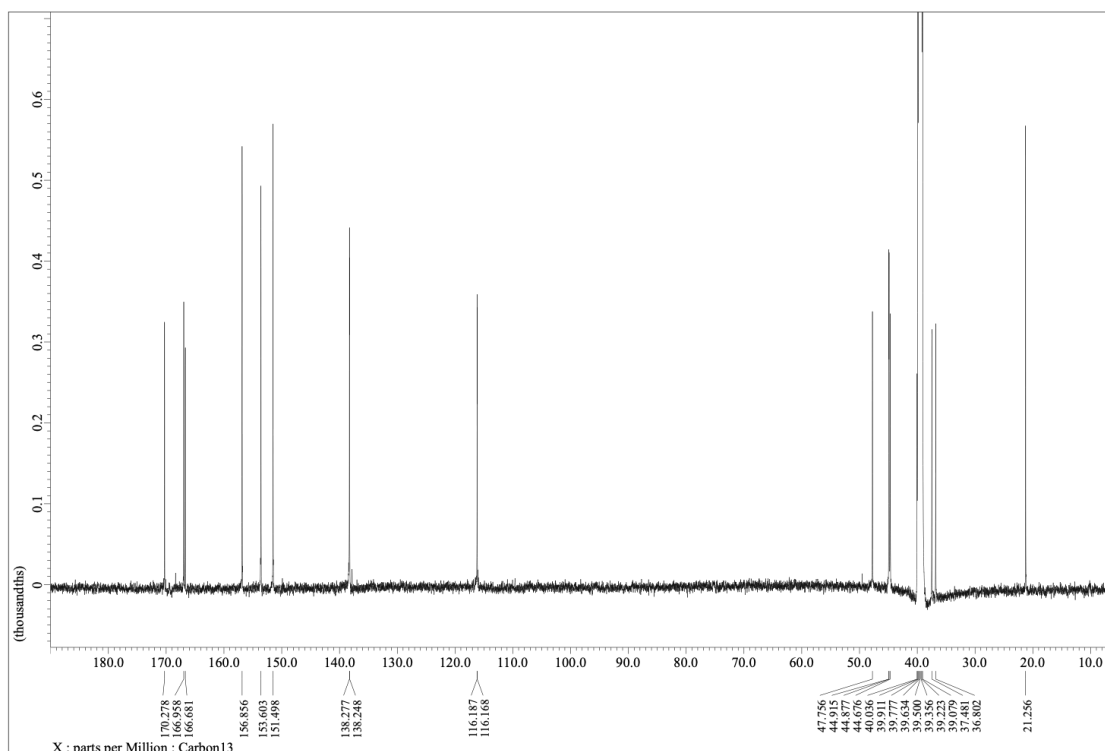

<sup>13</sup>C NMR spectrum of 12

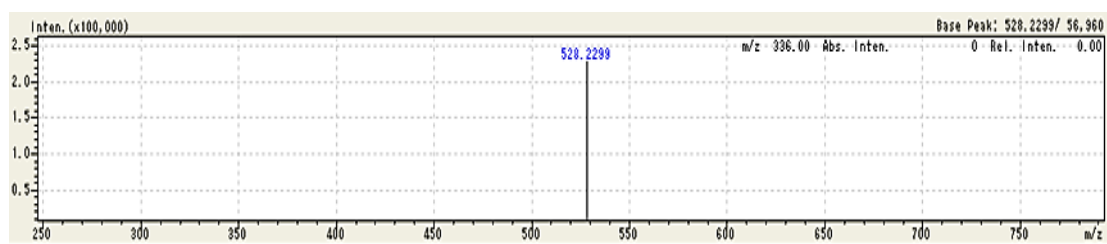

ESI-MS chromatogram of 12

### ***N,N*-Bis(2-(2-(2-amino-6-oxo-1*H*-purin-9(6*H*)-yl)acetamido)ethyl) propionamide (13)**

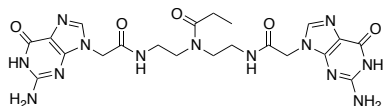

Compound **10** (40 mg, 0.06 mmol) was dissolved in CH<sub>2</sub>Cl<sub>2</sub> (600  $\mu$ L) and DIPEA (52.6  $\mu$ L, 5 eq), then stirred at 0°C. Propionyl chloride (10.5  $\mu$ L, 2 eq) was added into the mixture, stirred for 2 h at rt. DIPEA (1 eq) and propionyl chloride (1 eq) was added into the mixture, stirred for 1 h at rt. The reaction mixture was concentrated under reduced pressure, dried under vacuum.

The residue was added NH<sub>3</sub> in MeOH (7 M, 5 mL), stirred for over weekend at rt. The reaction mixture was concentrated under reduced pressure. The residue was added NH<sub>3</sub> in MeOH (7 M, 5 mL), stirred over weekend at rt. The reaction mixture was concentrated under reduced pressure. The residue was added MeOH, the precipitate was collected by centrifugation, washed with MeOH, dried under vacuum to afford **13** (9.7 mg, 0.018 mmol, 30% yield for 2 steps) as a pale yellow solid.

<sup>1</sup>H NMR (600 MHz, DMSO-*d*<sub>6</sub>)  $\delta$  8.23 (dt, *J* = 43.2, 5.9 Hz, 2H), 7.58 (d, *J* = 2.1 Hz, 2H), 6.42 (s, 4H), 4.59 (d, *J* = 14.5 Hz, 4H), 3.29-3.15 (m, 5H), 2.27 (q, *J* = 7.3 Hz, 2H), 0.95 (t, *J* = 7.2 Hz, 3H); <sup>13</sup>C NMR (151 MHz, DMSO-*d*<sub>6</sub>)  $\delta$  173.2, 166.9, 166.7, 156.9, 153.6, 153.6, 151.5, 138.3, 138.2, 116.2, 46.8, 45.0, 44.9, 40.0, 39.9, 39.8, 39.6, 39.5, 39.4, 39.2, 39.1, 38.8, 37.6, 36.8, 25.3, 9.5. ESI-HRMS calcd for C<sub>21</sub>H<sub>28</sub>N<sub>13</sub>O<sub>5</sub> [M+2H]<sup>2+</sup>: 271.6202, found: 271.6240.

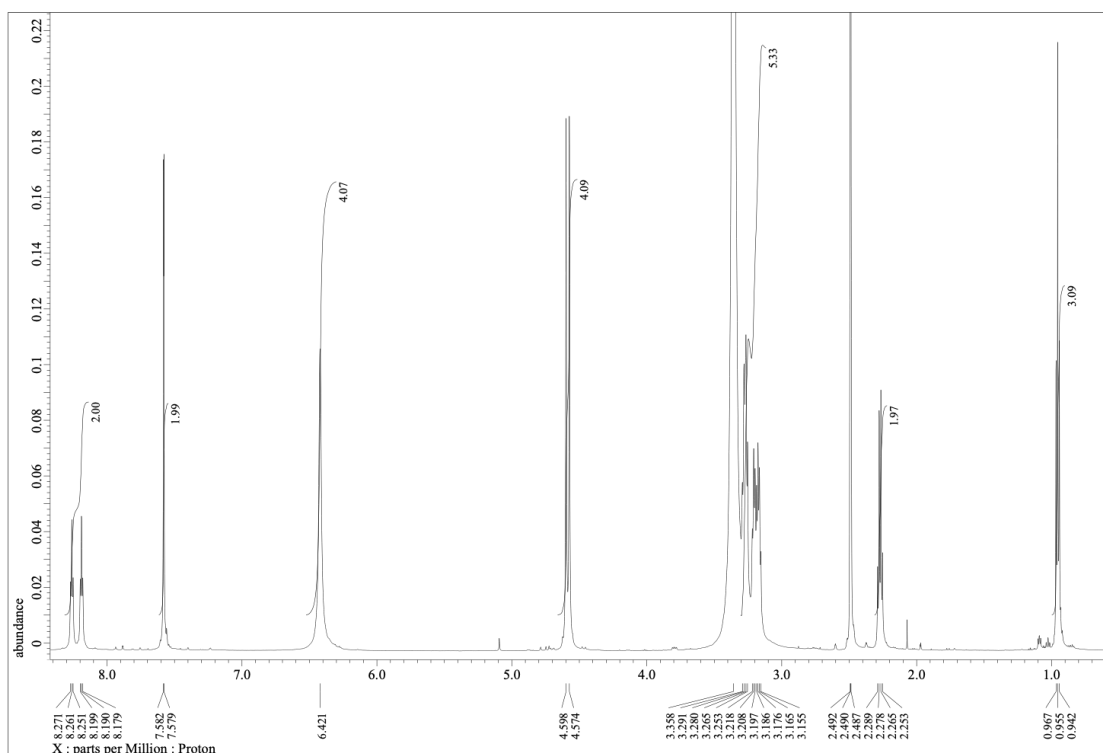

$^1\text{H}$  NMR spectrum of **13**

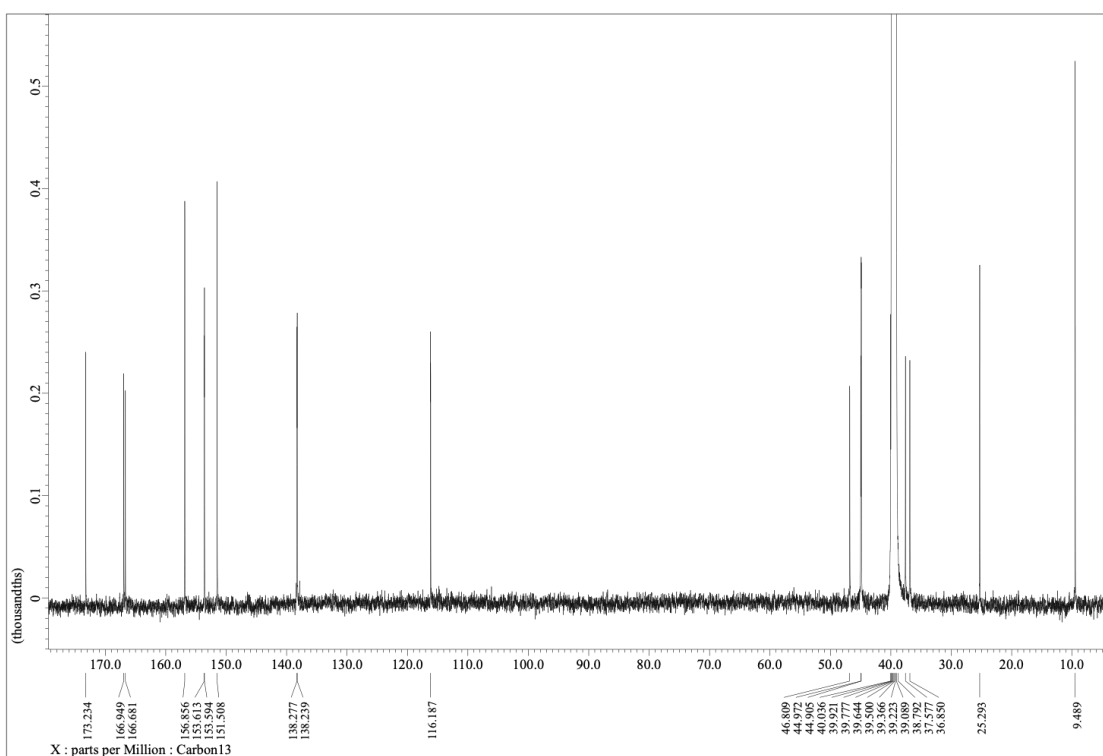

$^{13}\text{C}$  NMR spectrum of **13**

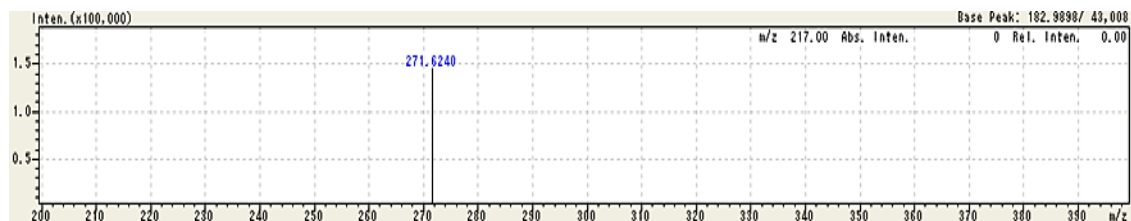

ESI-MS chromatogram of **13**

***N,N*-Bis(2-(2-(2-amino-6-oxo-1*H*-purin-9(6*H*)-yl)acetamido)ethyl) isobutyramide (**14**)**

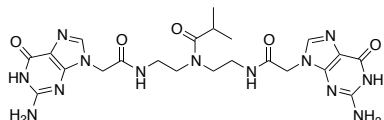

Compound **10** (40 mg, 0.06 mmol) was dissolved in CH<sub>2</sub>Cl<sub>2</sub> (600  $\mu$ L) and DIPEA (52.6  $\mu$ L, 5 eq), then stirred at 0°C. Isobutyryl chloride (13  $\mu$ L, 2 eq) was added into the mixture, stirred for 2 h at rt. DIPEA (1 eq) and isobutyryl chloride (1 eq) was added into the mixture, stirred for 1 h at rt. The reaction mixture was concentrated under reduced pressure, dried under vacuum.

The residue was added NH<sub>3</sub> in MeOH (7 M, 5 mL), stirred over weekend at rt. The reaction mixture was concentrated under reduced pressure. The residue was added MeOH, the precipitate was collected by centrifugation, washed with MeOH, dried under vacuum to afford **14** (8.5 mg, 0.015 mmol, 26% yield for 2 steps) as a pale yellow solid.

<sup>1</sup>H NMR (600 MHz, DMSO-*d*<sub>6</sub>)  $\delta$  8.24 (dt, *J* = 59.2, 5.9 Hz, 2H), 7.58 (d, *J* = 9.6 Hz, 2H), 6.42 (s, 4H), 4.58 (d, *J* = 15.8 Hz, 4H), 3.32–3.15 (m, 4H), 2.78 (sept., *J* = 6.7 Hz, 1H), 0.96 (d, *J* = 6.9 Hz, 6H); <sup>13</sup>C NMR (151 MHz, DMSO-*d*<sub>6</sub>)  $\delta$  176.7, 167.0, 166.7, 156.9, 153.6, 151.5, 138.3, 138.3, 116.2, 46.6, 45.0, 44.9, 40.0, 38.1, 36.9, 29.1, 19.7. ESI-HRMS calcd for C<sub>22</sub>H<sub>30</sub>N<sub>13</sub>O<sub>5</sub> [M+H]<sup>+</sup>: 556.2487, found: 566.2526.

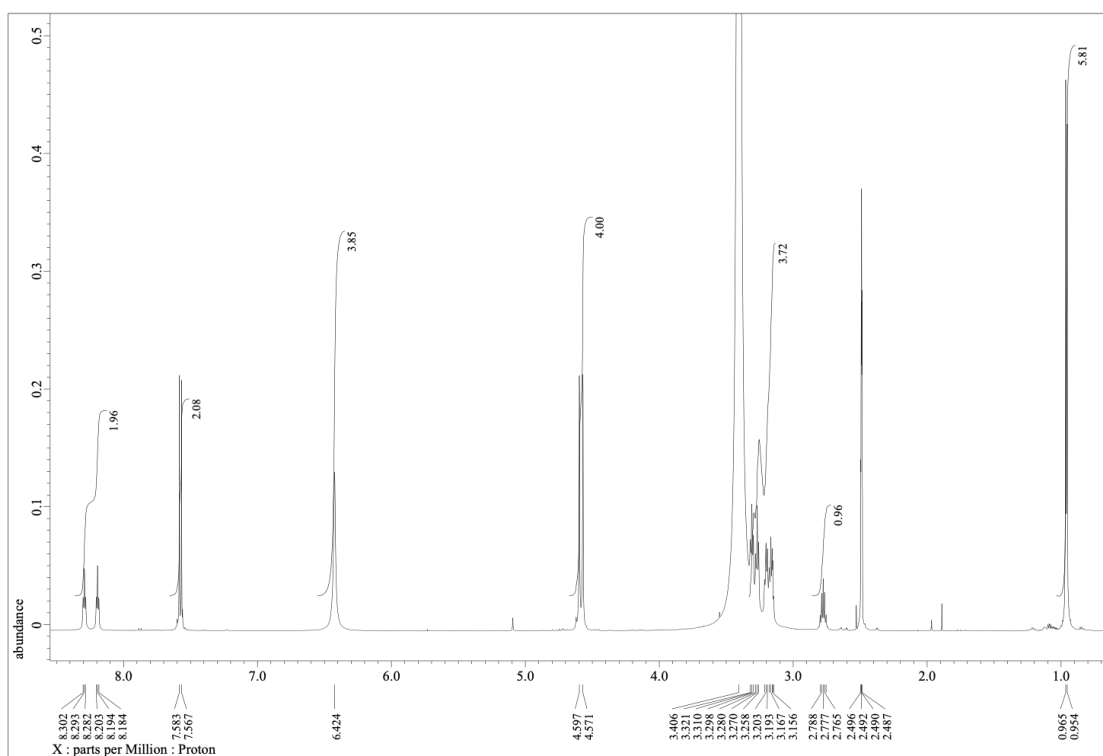

<sup>1</sup>H NMR spectrum of **14**

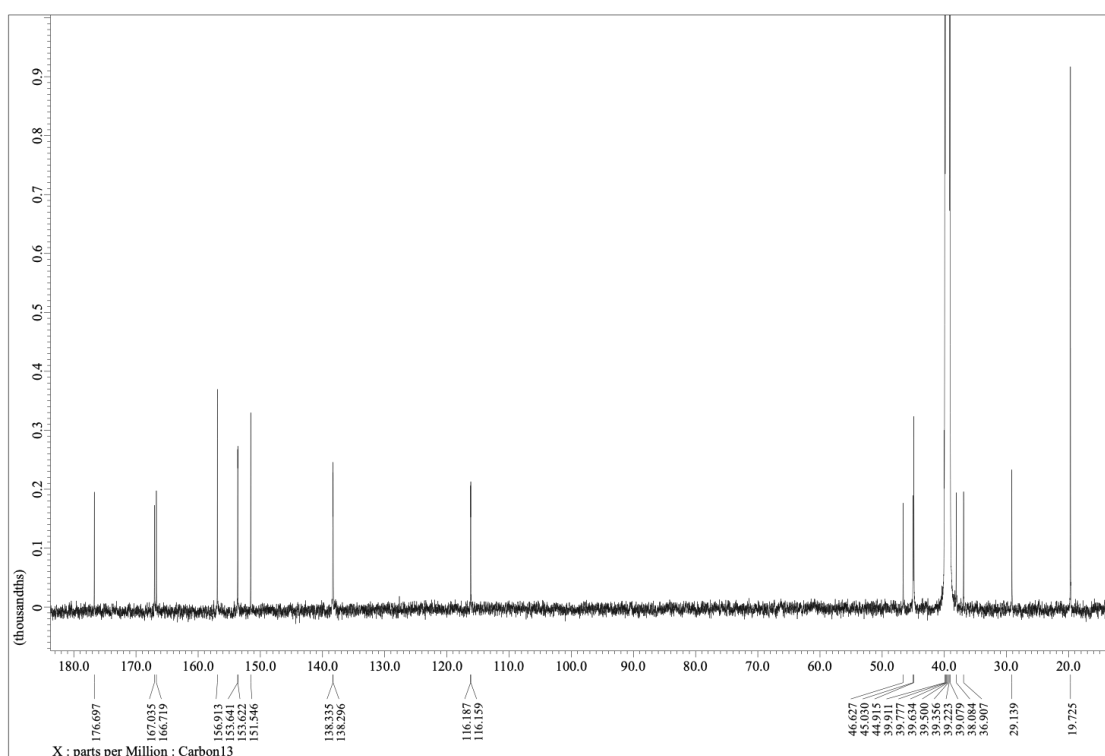

<sup>13</sup>C NMR spectrum of **14**

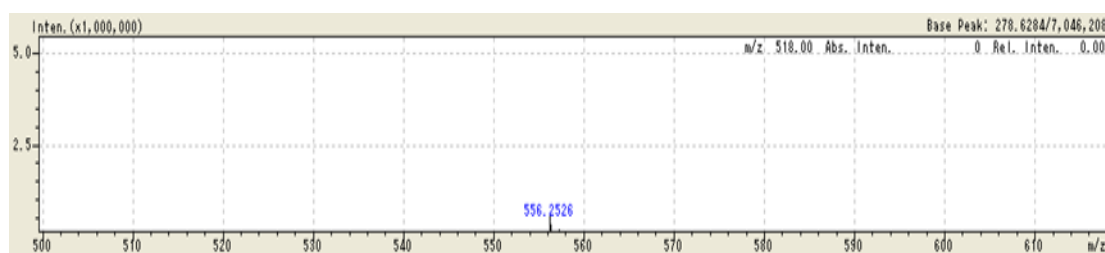

ESI-MS chromatogram of **14**

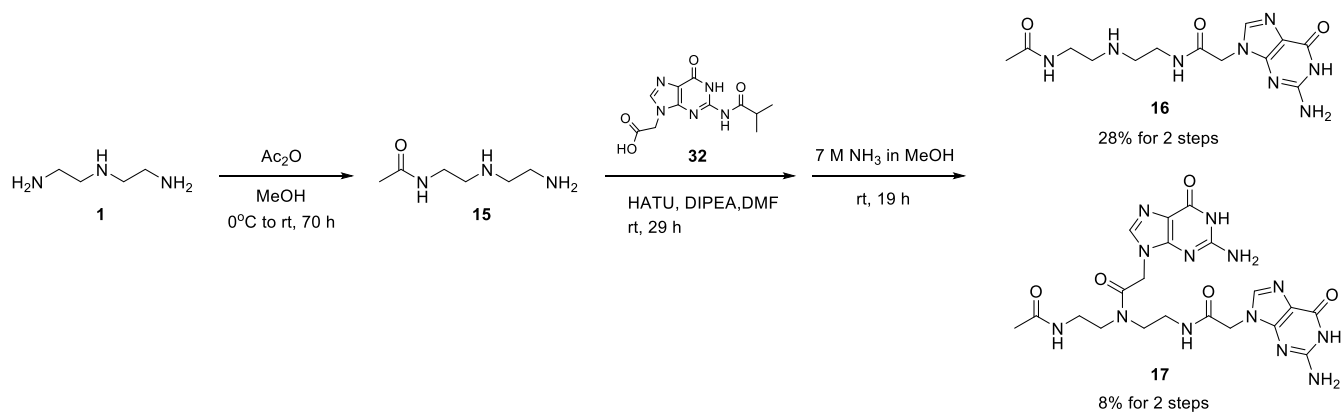

Scheme S4. Synthesis of compounds **16** and **17**

### ***N*-(2-((2-Aminoethyl)amino)ethyl)acetamide (15)**

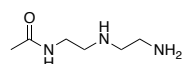

Compound **1** (1 mL, 0.01 mmol) was dissolved in MeOH (100 mL), stirred at 0°C. Acetic anhydride (5.7 mL, 0.2 eq) dissolved in MeOH (100 mL) was added dropwise over 4.5 h using a dropping funnel, stirred over weekend at 0°C to rt. The reaction mixture was concentrated under reduced pressure to remove solvent, diluted with CH<sub>2</sub>Cl<sub>2</sub>, extracted with H<sub>2</sub>O. The aqueous layer was concentrated under reduced pressure, dried under vacuum. The residue was purified by flash silica gel column chromatography ( $\phi$  = 4 cm, h = 13 cm, CH<sub>2</sub>Cl<sub>2</sub>/MeOH/28% NH<sub>4</sub>OH = 20:5:1 to 18:7:1), followed by purified by flash silica gel column chromatography ( $\phi$  = 4 cm, h = 11 cm, CH<sub>2</sub>Cl<sub>2</sub>/MeOH/28% NH<sub>4</sub>OH = 60:30:0 to 57:33:0 to 57:33:10) to afford **15** (1.14 g, 7.85 mmol, 79% yield) as a pale yellow oil.

<sup>1</sup>H NMR (600 MHz, DMSO-*d*<sub>6</sub>)  $\delta$  8.26 (s, 1H), 3.50 (q, *J* = 6.2 Hz, 2H), 2.97 (t, *J* = 5.9 Hz, 2H), 2.93 (t, *J* = 6.5 Hz, 2H), 2.89 (t, *J* = 6.2 Hz, 2H), 2.20 (s, 3H).

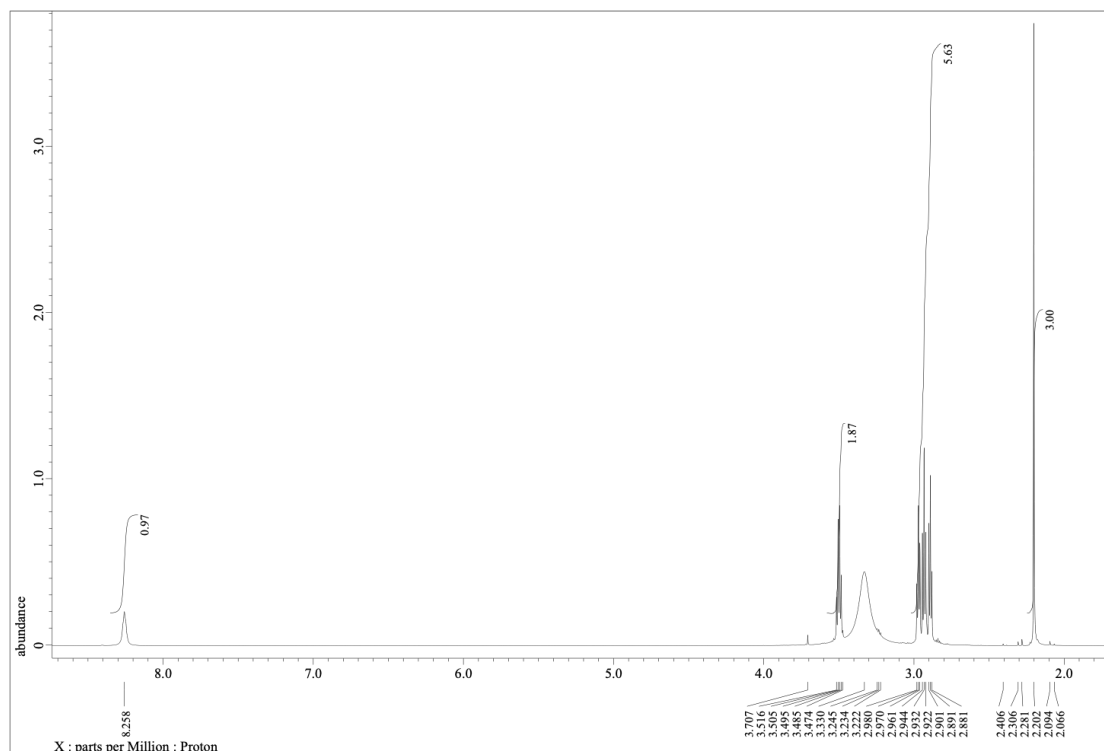

<sup>1</sup>H NMR spectrum of **15**

### ***N*-(2-((2-Acetamidoethyl)amino)ethyl)-2-(2-amino-6-oxo-1*H*-purin-9(6*H*)-yl)acetamide (16) and *N*-(2-Acetamidoethyl)-2-(2-amino-6-oxo-1*H*-purin-9(6*H*)-yl)-*N*-(2-((2-amino-6-oxo-1*H*-purin-9(6*H*)-yl)acetamido)ethyl)acetamide (17)**

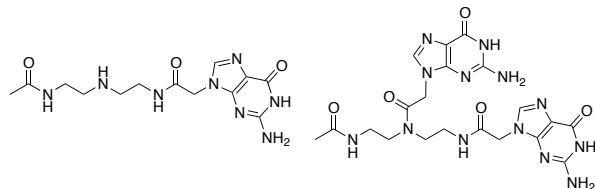

Compound **15** (145 mg, 1 mmol) was dissolved in DMF (5 mL) and stirred at 0°C. Compound **32** (279 mg, 1 eq), HATU (570 mg, 1.5 eq) and DIPEA (523  $\mu$ L, 3 eq) was added into the mixture, stirred overnight at rt. The reaction mixture was diluted with EtOAc, extracted with H<sub>2</sub>O. The aqueous layer was concentrated under reduced pressure, dried codistillation with MeOH. A half of the residue was added NH<sub>3</sub> in MeOH (7 M, 15 mL), stirred over weekend at rt. The reaction mixture was

concentrated under reduced pressure, dried under vacuum. The residue was purified by flash silica gel column chromatography ( $\phi$  = 2.5 cm, h = 10.5 cm, CH<sub>2</sub>Cl<sub>2</sub>/MeOH/28% NH<sub>4</sub>OH = 85:15:0 to 40:50:10) to afford **16** (47 mg, 0.14 mmol, 28% yield for 2 steps) as a pale orange solid and **17** (20 mg, 0.038 mmol, 8% yield for 2 steps) as a pale orange solid.

For **16**: <sup>1</sup>H NMR (600 MHz, DMSO-*d*<sub>6</sub>)  $\delta$  8.23 (t, *J* = 5.2 Hz, 1H), 7.89 (d, *J* = 4.8 Hz, 1H), 7.60 (s, 1H), 6.43 (s, 2H), 4.62 (s, 2H), 3.14 (dq, *J* = 30.5, 6.0 Hz, 4H), 2.65-2.61 (dt, *J* = 13.6 Hz, 6 Hz, 3H), 1.79 (s, 3H); <sup>13</sup>C NMR (151 MHz, DMSO-*d*<sub>6</sub>)  $\delta$  169.7, 166.7, 157.0, 153.6, 151.6, 138.5, 116.1, 48.0, 47.8, 44.9, 38.3, 38.1, 22.7. ESI-HRMS calcd for C<sub>13</sub>H<sub>21</sub>N<sub>8</sub>O<sub>3</sub> [M+H]<sup>+</sup>: 337.1731, found: 337.1850.

For **17**: <sup>1</sup>H NMR (600 MHz, DMSO-*d*<sub>6</sub>)  $\delta$  8.35 (t, *J* = 5.5 Hz, 1H), 8.21 (t, *J* = 5.9 Hz, 1H), 8.08 (t, *J* = 5.9 Hz, 1H), 7.89 (t, *J* = 5.9 Hz, 1H), 7.60 (s, 1H), 7.56 (d, *J* = 1.4 Hz, 2H), 7.54 (s, 1H), 6.43-6.35 (m, 10H), 4.88 (s, 4H), 4.70 (s, 2H), 4.59 (s, 2H), 3.41 (q, *J* = 6.9 Hz, 4H), 3.17 (dq, *J* = 34.1, 6.5 Hz, 4H), 1.85 (s, 3H), 1.76 (s, 3H); <sup>13</sup>C NMR (151 MHz, DMSO-*d*<sub>6</sub>)  $\delta$  170.0, 169.5, 167.2, 166.7, 166.7, 166.6, 156.8, 153.6, 153.5, 151.6, 151.5, 138.5, 138.4, 138.3, 138.2, 116.2, 116.1, 116.0, 46.3, 46.0, 45.4, 45.3, 45.0, 44.8, 43.6, 43.5,



40.1, 37.4, 37.3, 36.5, 36.3, 22.7, 22.6. ESI-HRMS calcd for  $C_{20}H_{26}N_{13}O_5$   $[M+H]^+$ : 528.2174, found: 528.2177.

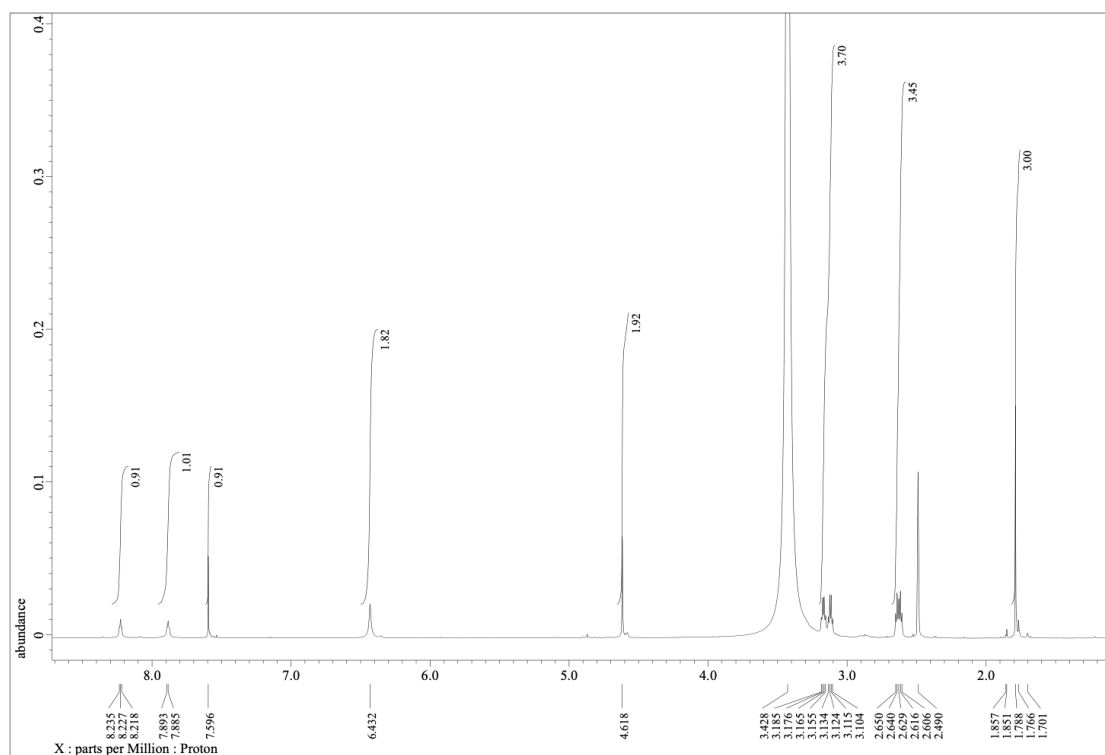

$^1H$  NMR spectrum of **16**

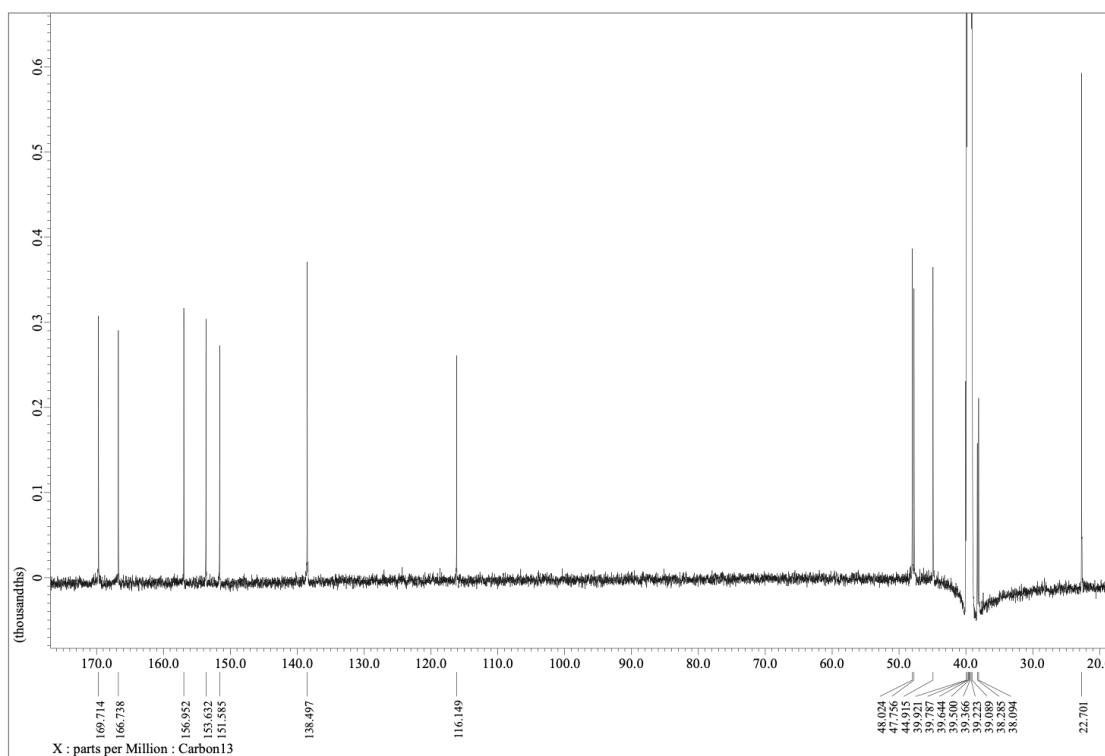

$^{13}C$  NMR spectrum of **16**

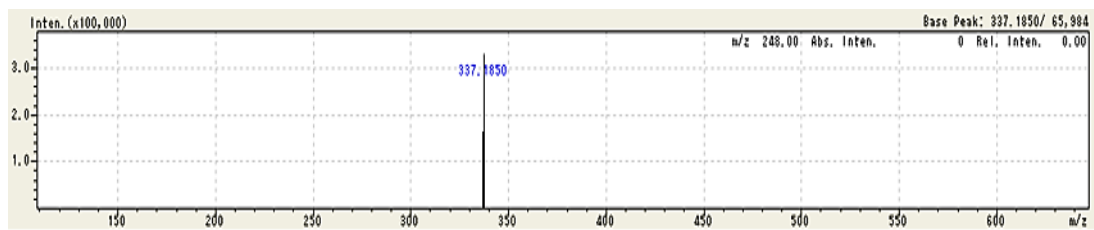

ESI-MS chromatogram of 16

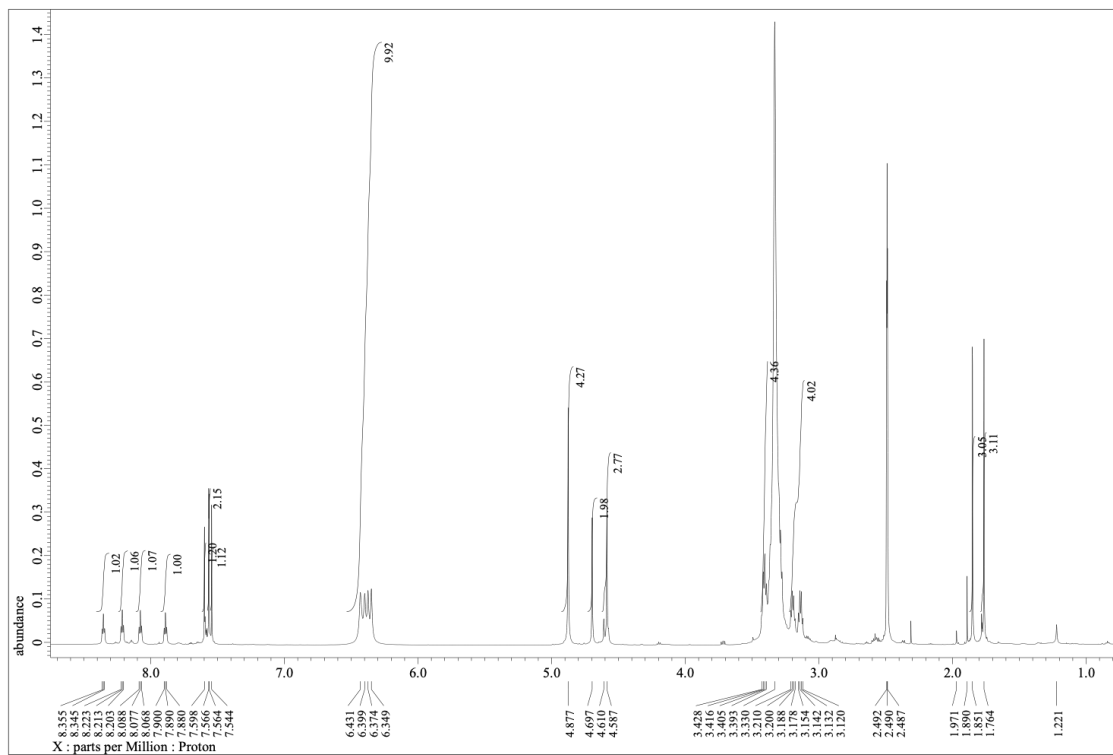

$^1\text{H}$  NMR spectrum of 17

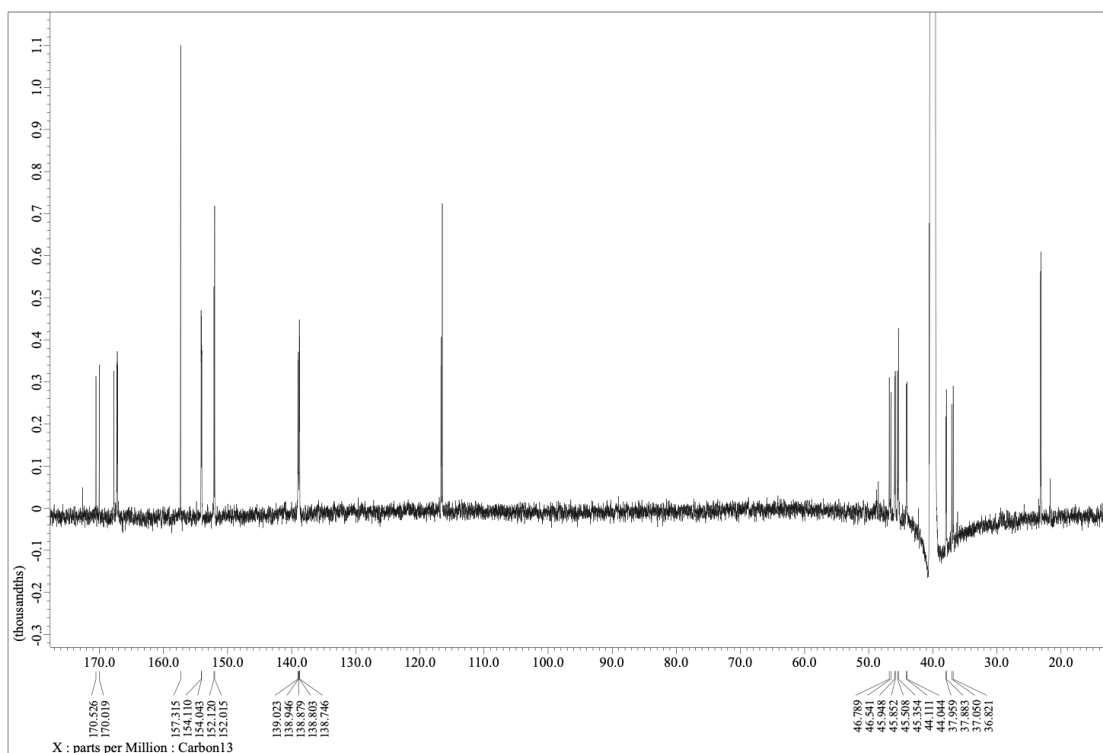

<sup>13</sup>C NMR spectrum of **17**

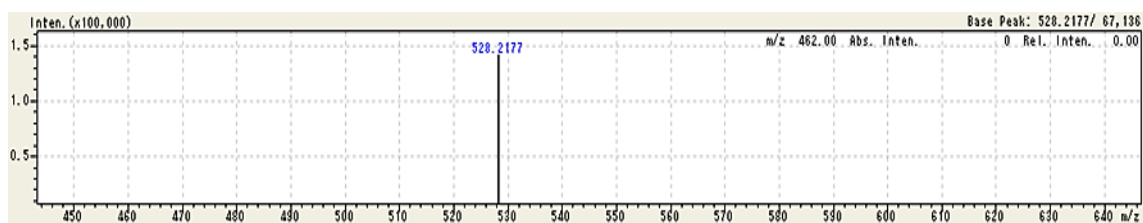

ESI-MS chromatogram of **17**

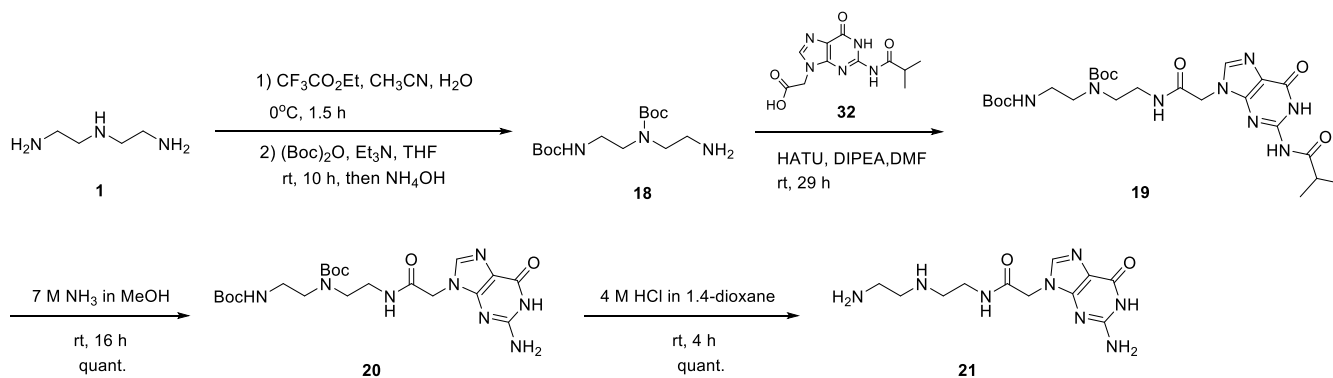

Scheme S5. Synthesis of compound **21**

***tert*-Butyl (2-aminoethyl)(2-((*tert*-butoxycarbonyl)amino)ethyl)carbamate (**18**)**

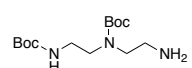  
Compound **1** (1.03 g, 10 mmol) was dissolved in MeOH (40 mL), stirred at -78°C. Ethyl trifluoroacetate (1.25 mL, 1.05eq) in MeOH (50 mL) was added dropwise into the mixture over 30 min using a dropping funnel, then stirred 1.5 h at 0°C. (Boc)<sub>2</sub>O (6.89 g, 3 eq) in MeOH (10 mL) was added into the mixture, stirred for 10 h at rt. The reaction mixture was concentrated under reduced pressure to give a colorless oil. The oil was dissolved in MeOH (15 mL), added 28% NH<sub>4</sub>OH (15 mL) at rt, stirred for 24 h at 50°C. After cooling to rt, the reaction mixture was concentrated under reduced pressure to remove the volatiles. The residue was added 1 M NaOH aq., and extracted with CH<sub>2</sub>Cl<sub>2</sub> (100 mL) 3 times. The combined organic extracts were dried over Na<sub>2</sub>SO<sub>4</sub>, filtered, concentrated under reduced pressure. Purified by flash silica gel column chromatography ( $\varphi$  = 2.5 cm, h = 15 cm, CH<sub>2</sub>Cl<sub>2</sub>/MeOH/28% NH<sub>4</sub>OH = 100:5:1 to 100:10:1) to afford **18** (1.82 g, 6.0 mmol, 60% yield) as a white solid. <sup>1</sup>H NMR (600 MHz, CDCl<sub>3</sub>)  $\delta$  5.41 (d, J = 123.3 Hz, 1H), 3.33-3.28 (m, 6H), 2.85 (br.s, 2H), 1.47 (s, 9H), 1.43 (s, 9H); <sup>13</sup>C NMR (151 MHz, CDCl<sub>3</sub>)  $\delta$  156.0, 155.9, 80.0, 79.1, 51.1, 50.6, 47.7, 47.2, 40.9, 40.4, 39.6, 28.4. ESI-HRMS calcd for C<sub>14</sub>H<sub>30</sub>N<sub>3</sub>O<sub>4</sub> [M+H]<sup>+</sup>: 304.2231, found: 304.2239.

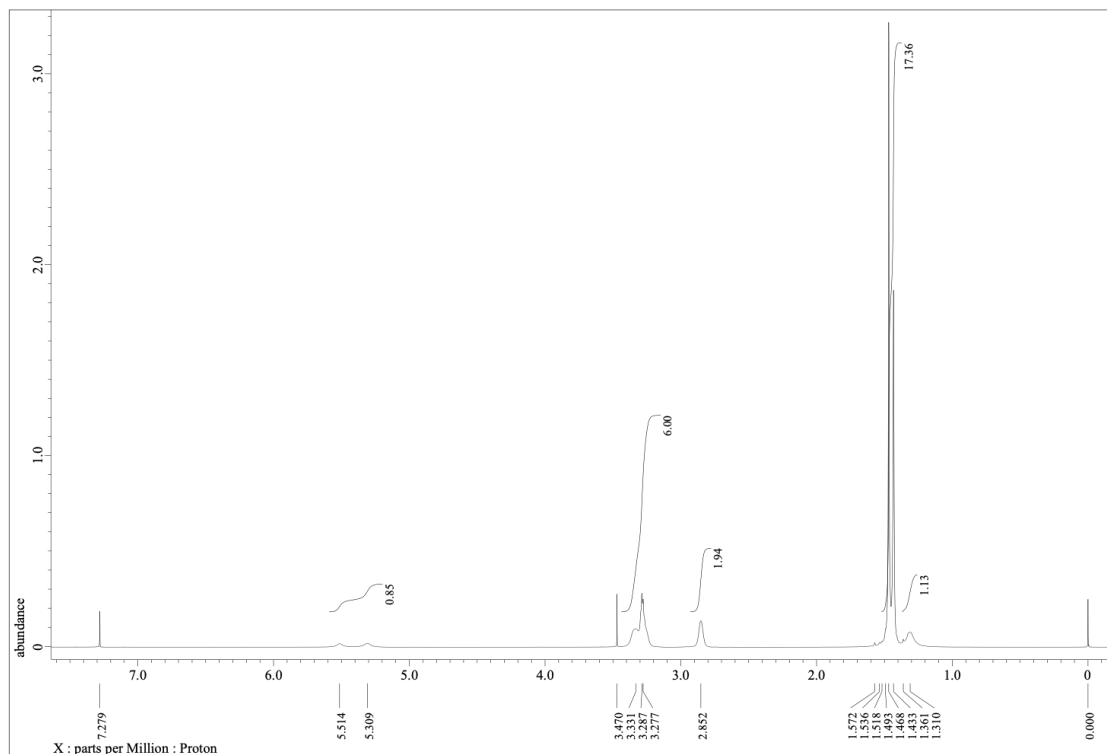

<sup>1</sup>H NMR spectrum of **18**

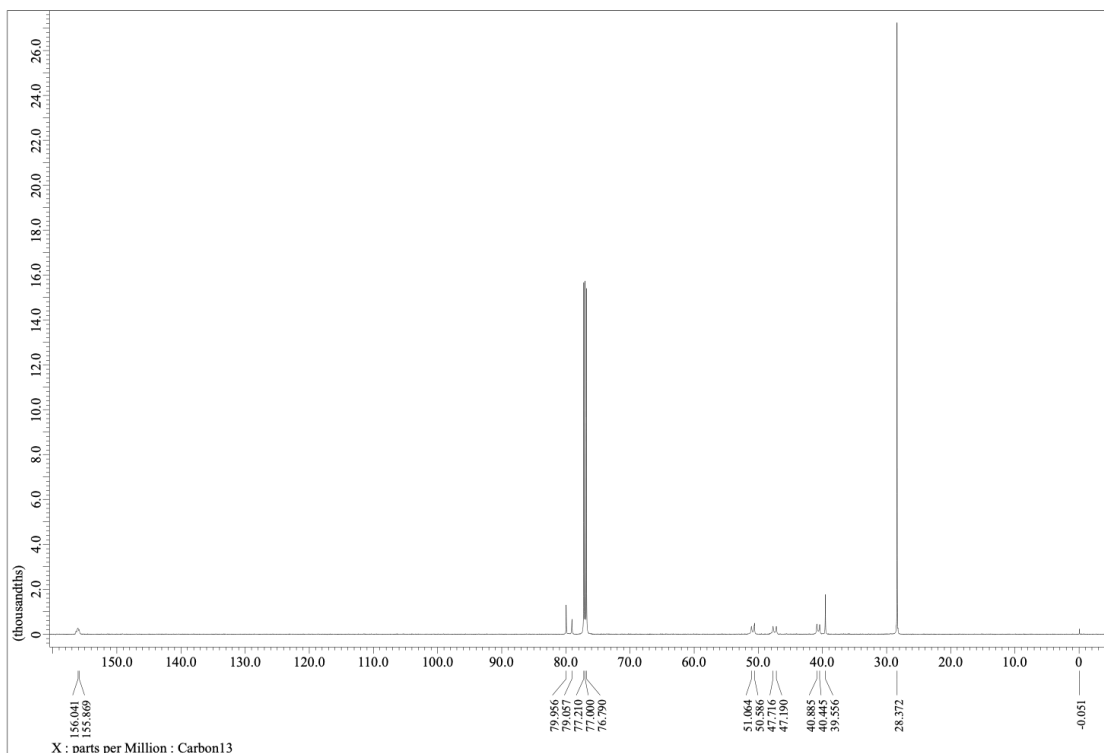

<sup>13</sup>C NMR spectrum of **18**

***tert*-Butyl (2-(((*tert*-butoxycarbonyl)amino)ethyl)(2-(2-(2-isobutyramido-6-oxo-1*H*-purin-9(6*H*)-yl)acetamido)ethyl)carbamate (**19**)**

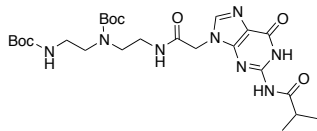

Compound **18** (30 mg, 0.1 mmol) was dissolved in DMF (500  $\mu$ L) and stirred at 0°C. Compound **32** (31 mg, 1.1 eq), HATU (57 mg, 1.5 eq) and DIPEA (52  $\mu$ L, 3 eq) was added into the mixture, stirred over weekend at rt. The reaction mixture was diluted with EtOAc, washed with HCl (1 M), brine. The aqueous layer was extracted with CH<sub>2</sub>Cl<sub>2</sub> 3 times. The organic layer was dried over Na<sub>2</sub>SO<sub>4</sub>, filtered, concentrated under reduced pressure. The residue was purified by flash NH silica gel column

chromatography ( $\phi$  = 1.5 cm, h = 10 cm, CH<sub>2</sub>Cl<sub>2</sub>/MeOH = 100:0 to 85:15) to afford **19** (24 mg, 0.043 mmol, 43% yield) as a pale yellow solid.

<sup>1</sup>H NMR (600 MHz, CDCl<sub>3</sub>)  $\delta$  7.70 (d,  $J$  = 17.9 Hz, 1H), 5.43-5.21 (m, 1H), 4.84-4.73 (m, 2H), 3.50-3.29 (m, 8H), 3.03-2.96 (m, 2H), 2.89-2.85 (m, 1H), 1.49-1.41 (m, 18H), 1.25 (s,  $J$  = 6.2 Hz, 6H). ESI-HRMS calcd for C<sub>25</sub>H<sub>41</sub>N<sub>8</sub>O<sub>7</sub> [M+H]<sup>+</sup>: 565.3093, found: 565.3116.

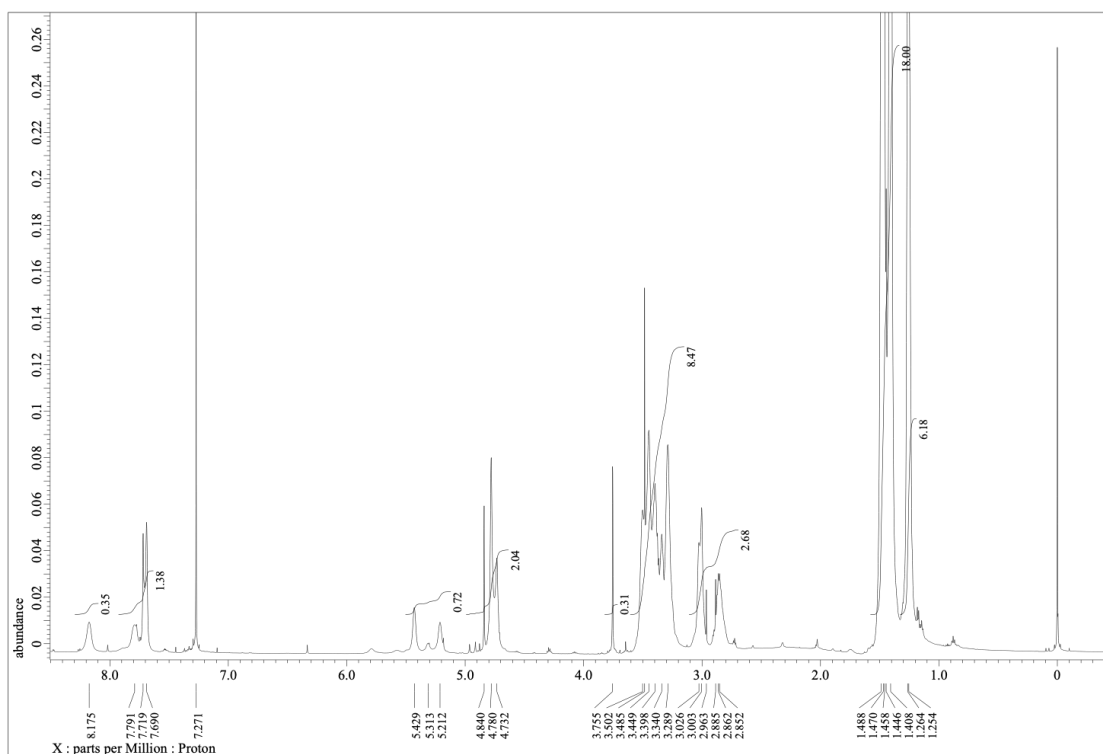

<sup>1</sup>H NMR spectrum of **19**

***tert*-Butyl (2-(2-(2-amino-6-oxo-1*H*-purin-9(6*H*)-yl)acetamido)ethyl)(2-((*tert*-butoxycarbonyl)amino)ethyl)carbamate (**20**)**

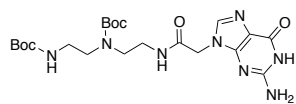

Compound **19** (24 mg, 0.043 mmol) was added NH<sub>3</sub> in MeOH (7 M, 10 mL), stirred for 18 h at rt. The reaction mixture was concentrated under reduced pressure, dried under vacuum to afford **20** (24 mg, 0.049 mmol, quant.) as a pale yellow solid.

<sup>1</sup>H NMR (600 MHz, CDCl<sub>3</sub>) δ 4.71 (br.s, 1H), 3.48-3.22 (m, 7H), 2.96-2.88 (m, 2H), 1.46-1.25 (m, 18H).

ESI-HRMS calcd for C<sub>21</sub>H<sub>35</sub>N<sub>8</sub>O<sub>6</sub> [M+H]<sup>+</sup>: 495.2674, found: 495.2709.

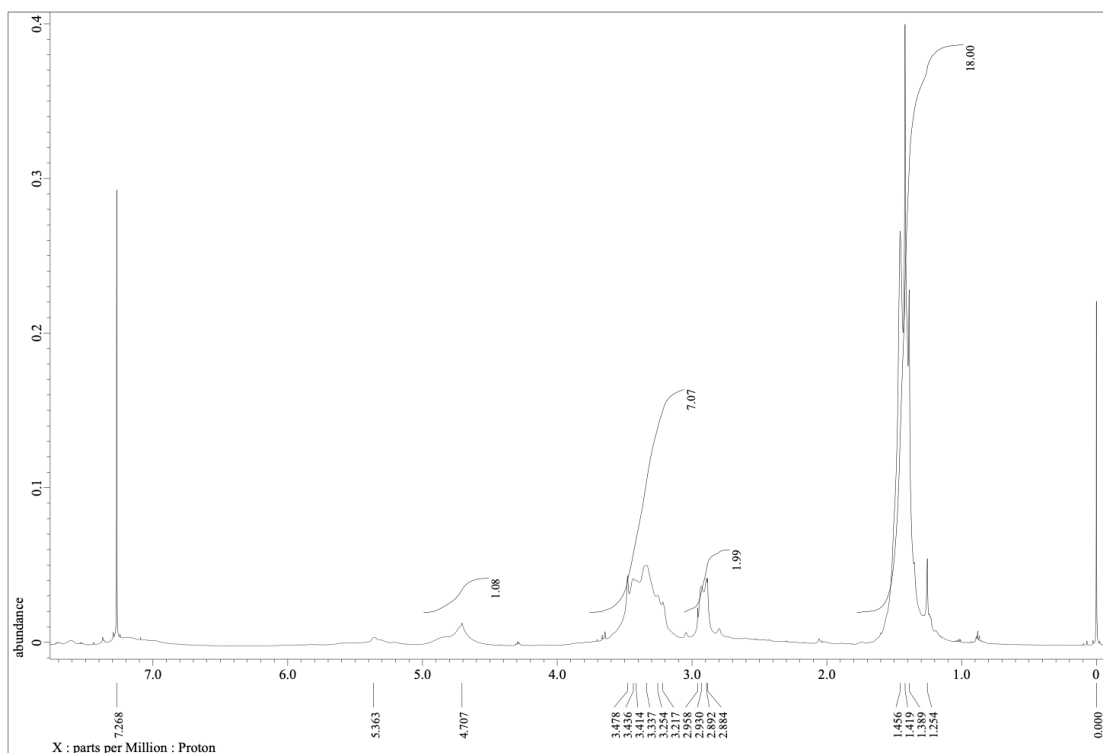

<sup>1</sup>H NMR spectrum of **20**

**2-(2-Amino-6-oxo-1H-purin-9(6H)-yl)-N-((2-aminoethyl)amino)ethyl acetamide (**21**)**

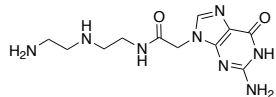

Compound **20** (24 mg, 0.049 mmol) was added HCl in 1,4-dioxane (4 M, 10 mL), stirred for 1 h at rt. The reaction mixture was concentrated under reduced pressure. The residue was added ACN, the precipitate was collected by centrifugation, washed with ACN 2 times, dried under vacuum to afford **21** (15.5 mg, 0.053 mmol, quant.) as a white solid.

<sup>1</sup>H NMR (600 MHz, CD<sub>3</sub>OD) δ 9.19 (s, 1H), 5.12 (s, 2H), 3.74-3.57 (m, 4H), 3.41 (dt, *J* = 13.3, 5.2 Hz, 4H), 3.03 (s, 1H); <sup>13</sup>C NMR (151 MHz, CD<sub>3</sub>OD) δ 168.6, 157.4, 155.1, 152.0, 139.5, 108.4, 73.5, 72.4, 62.2, 47.5, 45.9, 43.8, 40.6, 37.2, 37.0. ESI-HRMS calcd for C<sub>11</sub>H<sub>19</sub>N<sub>8</sub>O<sub>2</sub> [M+H]<sup>+</sup>: 295.1625, found: 294.9645.

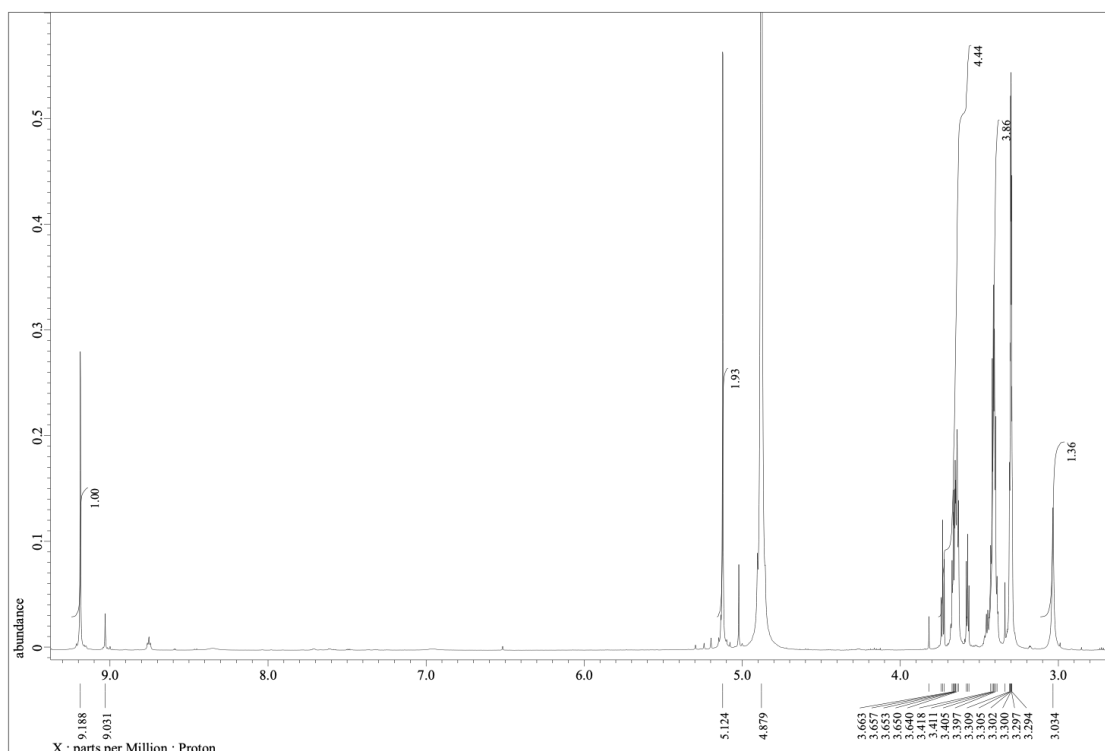

$^1\text{H}$  NMR spectrum of **21**

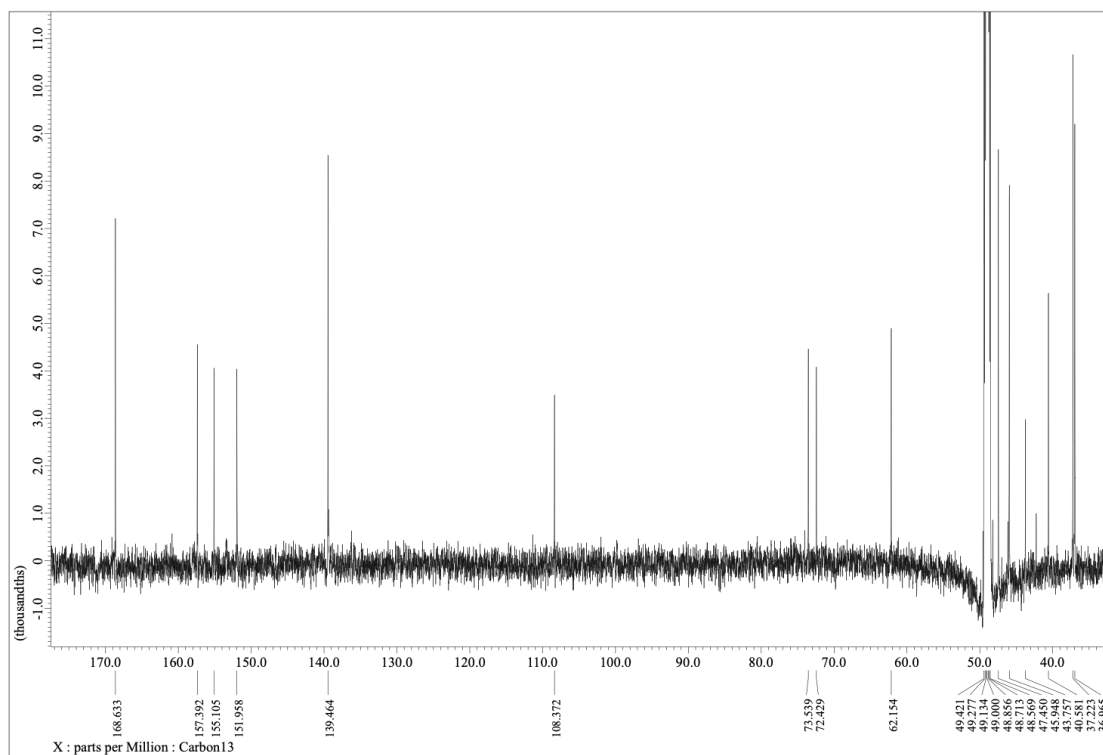

$^{13}\text{C}$  NMR spectrum of **21**



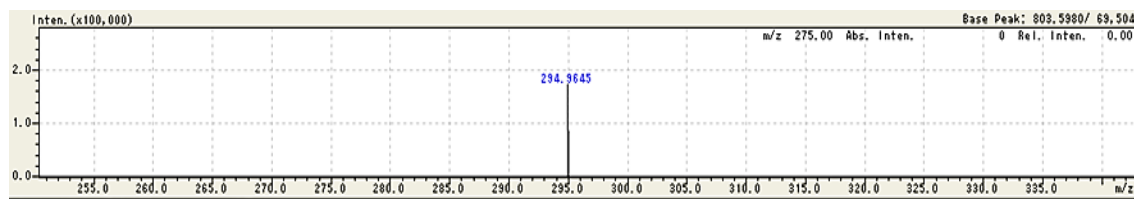

ESI-MS chromatogram of **21**

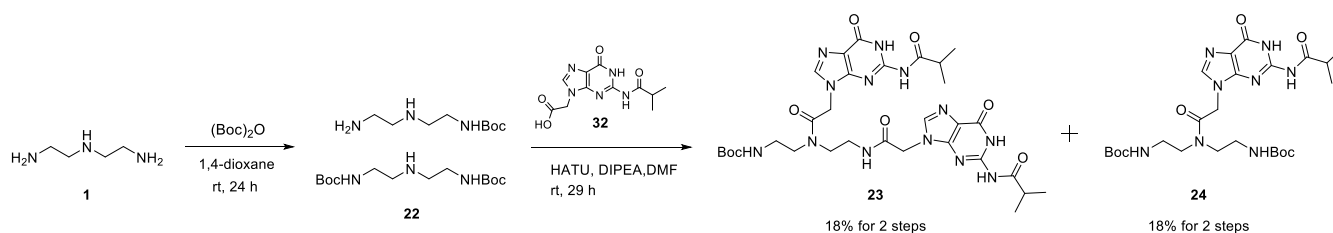

Scheme S7. Synthesis of compounds **23** and **24**

***tert*-Butyl (2-((2-aminoethyl)amino)ethyl)carbamate (**22**)**<sup>[S3]</sup>

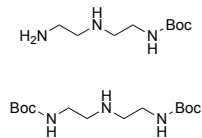

Compound **1** (10.9 mL, 100 mmol) was dissolved in 1,4-dioxane (17 mL), stirred at rt. (Boc)<sub>2</sub>O (3.1 g, 0.14 eq) in 1,4-dioxane (20 mL) was added dropwise over 1 h using a dropping funnel, stirred for 24 h. The reaction mixture was concentrated under reduced pressure at 50°C. The residue was added H<sub>2</sub>O (15 mL) then filtered. The filtrate was extracted with CH<sub>2</sub>Cl<sub>2</sub> (9 mL) 5 times. The combined extracts were dried over Na<sub>2</sub>SO<sub>4</sub>, filtered, concentrated under reduced pressure, dried under vacuum to afford mixture **22** (1.98 g) as a colorless oil.

<sup>1</sup>H NMR (600 MHz, CDCl<sub>3</sub>) δ 5.00 (br.s, 1H), 3.22 (s, 2H), 2.85-2.66 (m, 6H), 1.45 (s, 9H). ESI-HRMS calcd for C<sub>9</sub>H<sub>22</sub>N<sub>3</sub>O<sub>2</sub> [M+H]<sup>+</sup>: 204.1707, found: 204.1698.

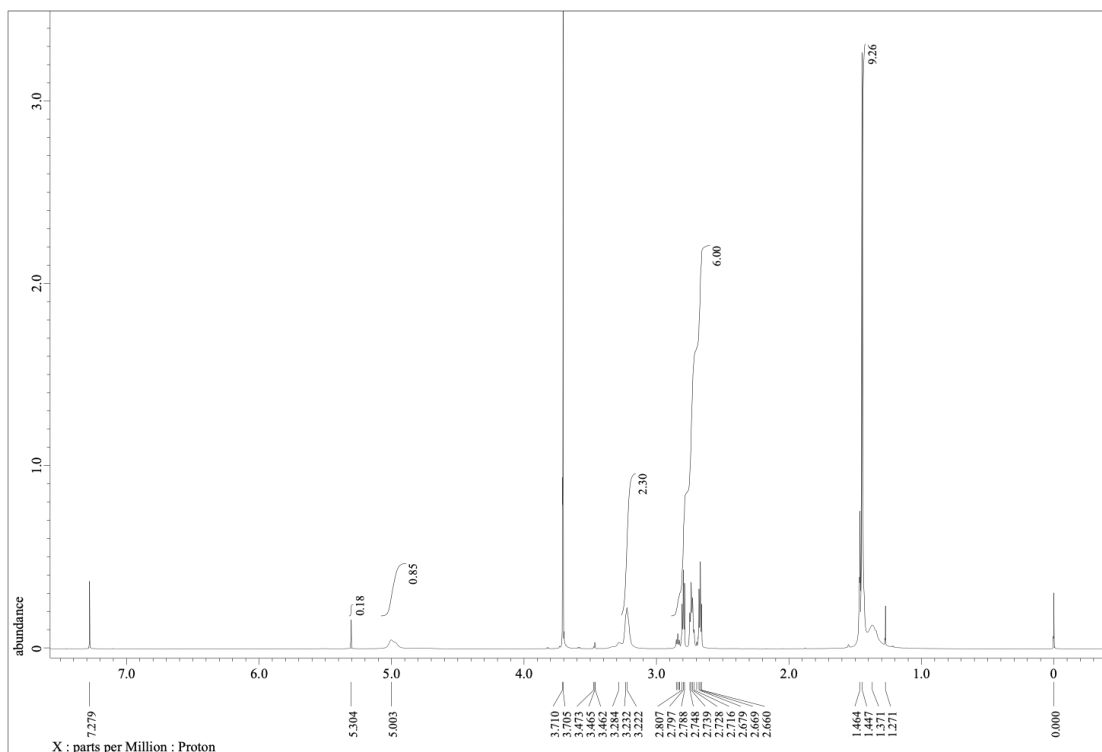

<sup>1</sup>H NMR spectrum of **22**

**tert-Butyl (2-(2-(2-isobutyramido-6-oxo-1H-purin-9(6H)-yl)-N-(2-(2-(2-isobutyramido-6-oxo-1H-purin-9(6H)-yl)acetamido)ethyl)acetamido)ethyl) carbamate (23) and Di-tert-butyl (((2-(2-isobutyramido-6-oxo-1H-purin-9(6H)-yl)acetyl)azanediyl)bis(ethane-2,1-diyl))dicarbamate (24)**

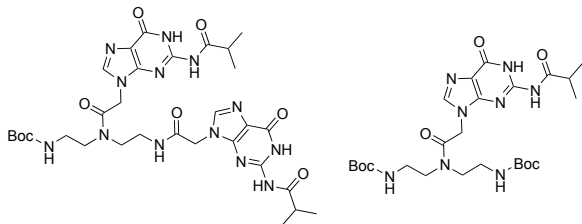

Mixture **22** (102 mg) was dissolved in DMF (2.5 mL) and stirred at 0°C. Compound **32** (305 mg, 2.2 eq), HATU (570 mg, 3 eq) and DIPEA (523  $\mu$ L, 6 eq) was added into the mixture, stirred for 29 h at rt. The reaction mixture was diluted with EtOAc, washed with HCl (1 M), brine. The organic layer was dried over Na<sub>2</sub>SO<sub>4</sub>, filtered, concentrated under reduced pressure, dried under vacuum. The residue was purified by flash silica gel column chromatography (Yamazen inject column size: M, Yamazen Hi-flash column size: M, CH<sub>2</sub>Cl<sub>2</sub>/MeOH = 99:1 to 80:20) to afford **23** (91 mg,

0.13 mmol, 18% yield for 2 steps) as a pale orange solid and **24** (72 mg, 0.13 mmol, 18% for 2 steps) as a dull orange gum.

For **23** : <sup>1</sup>H NMR (600 MHz, CD<sub>3</sub>OD)  $\delta$  8.63 (d,  $J$  = 4.1 Hz, 2H), 8.34-8.32 (d,  $J$  = 7.2 Hz, 2H), 7.44 (q,  $J$  = 4.4 Hz, 2H), 7.20 (t,  $J$  = 7.6 Hz, 1H), 7.15-7.08 (m, 1H), 5.15 (t,  $J$  = 23.1 Hz, 2H), 3.74-3.34 (m, 1H), 3.26-3.18 (m, 1H), 2.74-2.61 (m, 2H), 2.31 (s, 1H), 1.40 (d,  $J$  = 4.1 Hz, 8H), 1.37-1.34 (m, 6H), 1.19-1.18 (m, 9H). ESI-HRMS calcd for C<sub>31</sub>H<sub>44</sub>N<sub>13</sub>O<sub>8</sub> [M+H]<sup>+</sup>: 726.3430, found: 726.3393.

For **24** : <sup>1</sup>H NMR (600 MHz, CD<sub>3</sub>OD)  $\delta$  8.68 (t,  $J$  = 2.4 Hz, 1H), 8.38 (dd,  $J$  = 8.3, 1.4 Hz, 1H), 7.97-7.90 (m, 1H), 7.48 (q,  $J$  = 4.4 Hz, 1H), 7.20 (t,  $J$  = 7.6 Hz, 2H), 7.14 (d,  $J$  = 6.9 Hz, 2H), 7.10 (t,  $J$  = 7.2 Hz, 1H), 5.13 (s, 1H), 3.72 (sept.,  $J$  = 6.5 Hz, 3H), 3.56 (t,  $J$  = 6.2 Hz, 1H), 3.44 (t,  $J$  = 6.2 Hz, 1H), 3.36 (t,  $J$  = 6.5 Hz, 1H), 3.22 (q,  $J$  = 7.3 Hz, 4H), 2.73-2.68 (m, 1H), 2.31 (s, 3H), 1.41 (s, 10H), 1.37-1.34 (m, 25H), 1.22-1.19 (m, 6H). ESI-HRMS calcd for C<sub>25</sub>H<sub>41</sub>N<sub>8</sub>O<sub>7</sub> [M+H]<sup>+</sup>: 565.3093, found: 565.3061.

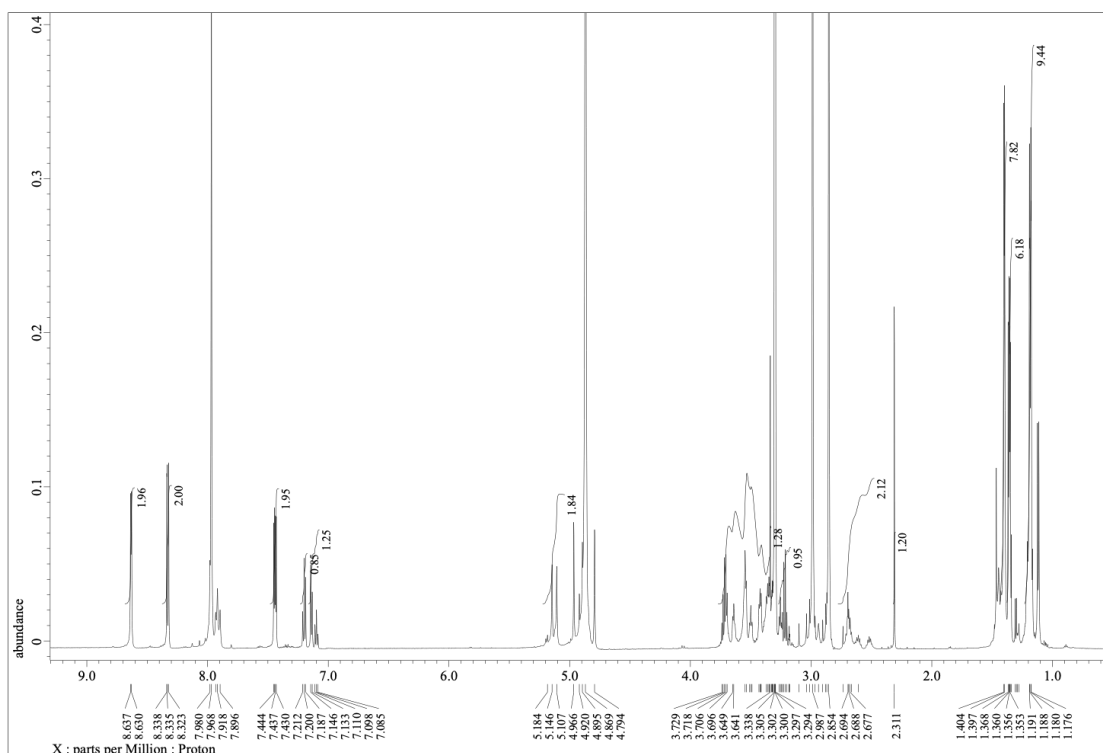

<sup>1</sup>H NMR spectrum of **23**

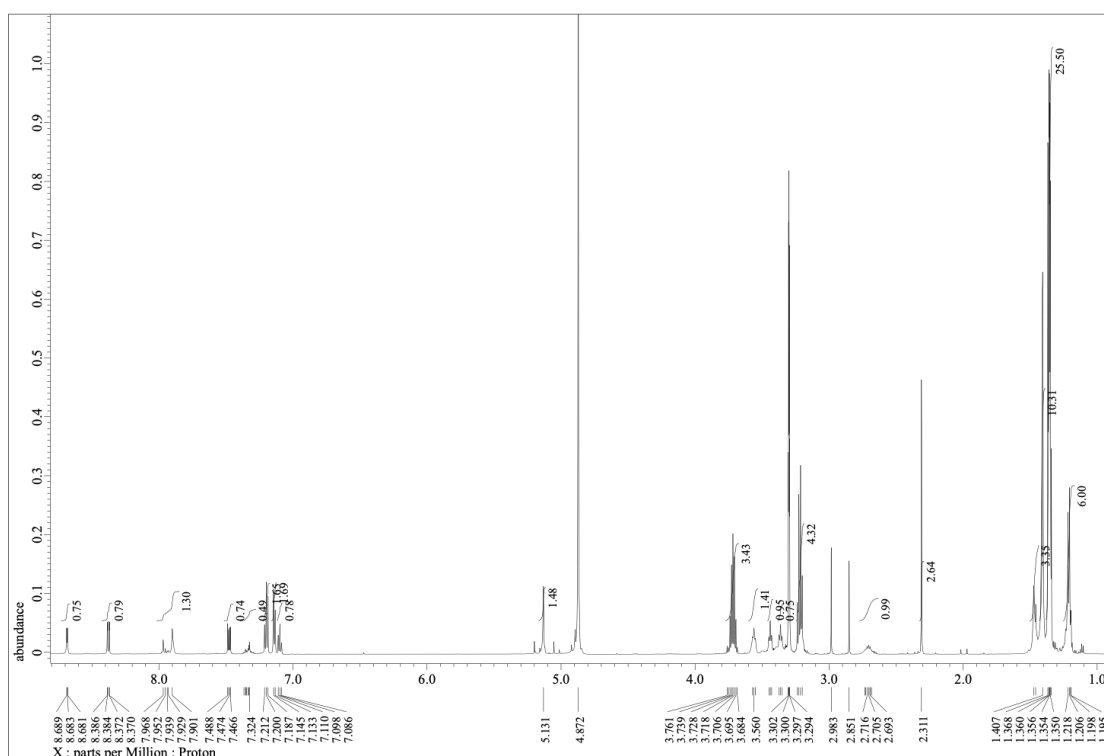

<sup>1</sup>H NMR spectrum of **24**

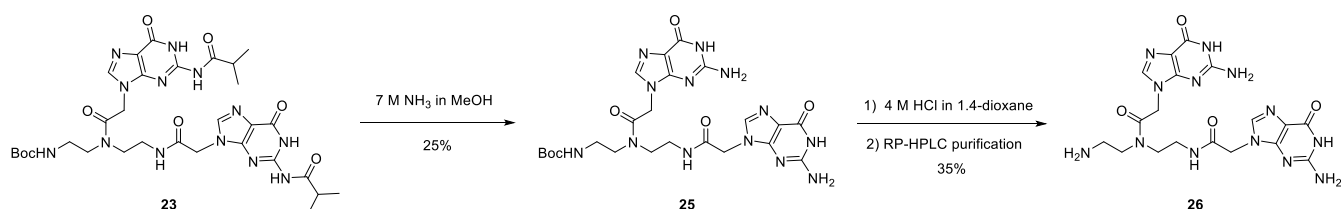

Scheme S8. Synthesis of compound **26**

***tert*-Butyl (2-(2-(2-amino-6-oxo-1*H*-purin-9(6*H*)-yl)-*N*-(2-(2-(2-amino-6-oxo-1*H*-purin-9(6*H*)-yl)acetamido)ethyl)acetamido)ethyl)carbamate (**25**)**

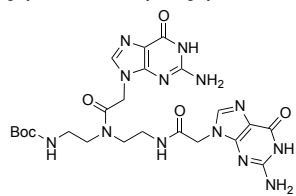

Compound **23** (91 mg, 0.13 mmol) was added NH<sub>3</sub> in MeOH (7 M, 5 mL), stirred for 20 h at rt. The reaction mixture was concentrated under reduced pressure. The residue was added NH<sub>3</sub> in MeOH (7 M, 5 mL), stirred for 23 h at 30°C. The resulting precipitate was collected by centrifugation, washed with ACN 2 times, dried under vacuum to afford **25** (18.6 mg, 0.032 mmol, 25% yield) as a pale orange solid. <sup>1</sup>H NMR (600 MHz, DMSO-*d*<sub>6</sub>) δ 7.59-7.52 (m, 2H), 6.40 (br.s, 1H), 6.35 (br.s, 2H), 4.86 (d, *J* = 4.1 Hz, 2H), 4.69 (s, 1H), 4.58 (s, 1H), 3.20-3.16 (m, 2H), 3.03 (t, *J* = 6.2 Hz, 1H), 1.36 (d, *J* = 15.8 Hz, 9H). ESI-HRMS calcd for C<sub>23</sub>H<sub>32</sub>N<sub>13</sub>O<sub>6</sub> [*M*+*H*]<sup>+</sup>: 586.2593, found: 586.2638.

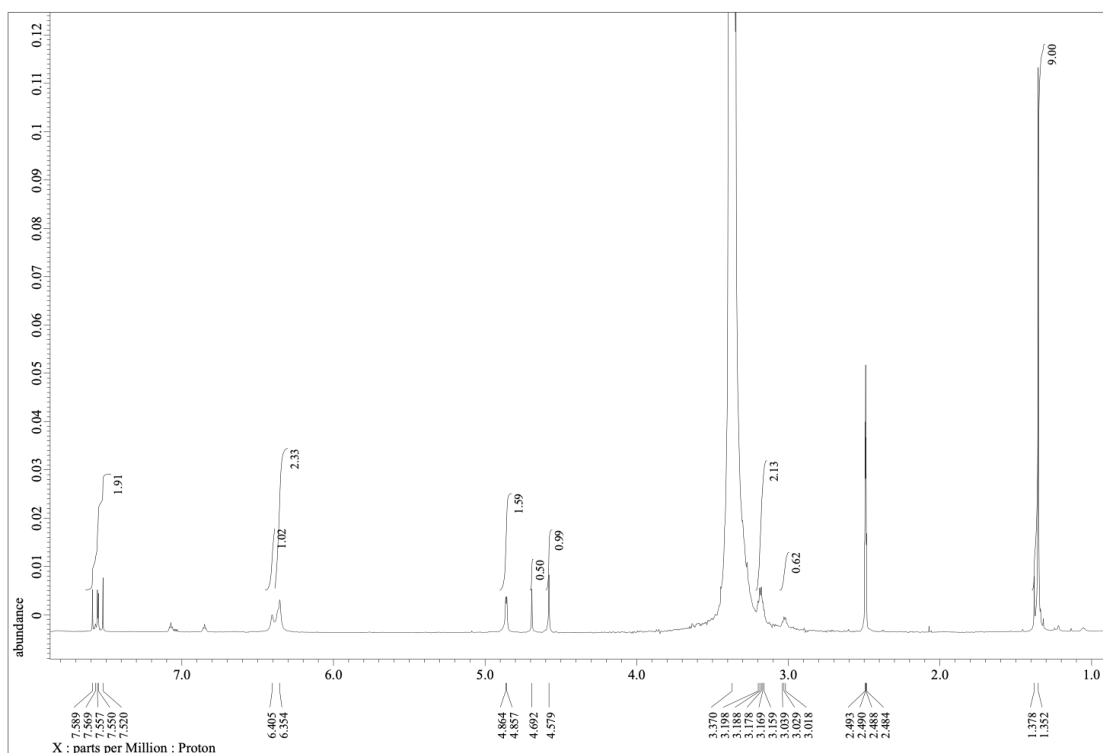

<sup>1</sup>H NMR spectrum of **25**

2-(2-Amino-6-oxo-1*H*-purin-9(6*H*)-yl)-*N*-(2-(2-(2-amino-6-oxo-1*H*-purin-9(6*H*)-yl)acetamido)ethyl)-*N*-(2-aminoethyl)acetamide  
(26)

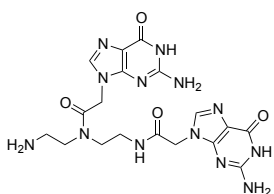

Compound **25** (15 mg, 0.026 mmol) was added HCl in 1,4-dioxane (4 M, 5 mL) and stirred at rt for 4 h. The reaction mixture was concentrated under reduced pressure, and the residue was dried by codistillation with MeOH. The residue was purified by HPLC (LC-2000Plus (JASCO); Discovery BIO Wide Pore C18 HPLC Column (Supelco), 21.2 × 250 mm, 10 μm; Flow rate: 10 mL/min; rt; Mobile phase A: 0.1% TFA in H<sub>2</sub>O, B: 0.1% TFA in ACN; B 10% to 60 % (30 min); Detection : 260 nm) to afford **26** (4.4 mg, 9.1 μmol, 35% yield) as a pale yellow solid.

<sup>1</sup>H NMR (600 MHz, DMSO-*d*<sub>6</sub>) δ 10.70 (d, *J* = 6.2 Hz, 2H), 8.39 (t, *J* = 5.5 Hz, 1H), 7.68 (dd, *J* = 11.7, 4.1 Hz, 4H), 6.47 (d, *J* = 13.8 Hz, 1H), 6.41 (s, 3H), 4.90 (s, 1H), 4.71 (s, 1H), 4.60 (d, *J* = 20.0 Hz, 1H), 2.91 (q, *J* = 6.0 Hz, 1H), 2.45 (t, *J* = 1.7 Hz, 1H); <sup>13</sup>C NMR (151 MHz, DMSO-*d*<sub>6</sub>) δ 167.7, 167.2, 166.8, 158.6, 158.4, 158.1, 157.9, 156.6, 153.9, 153.8, 151.5, 151.4, 138.7, 138.3, 119.8, 117.8, 115.8, 115.2, 115.1, 115.0, 115.0, 113.9, 48.7, 46.2, 46.0, 45.2, 45.0, 43.9, 43.6, 37.2, 37.0, 36.4, 35.4. ESI-MS : 486.2217 [M+H]<sup>+</sup>.

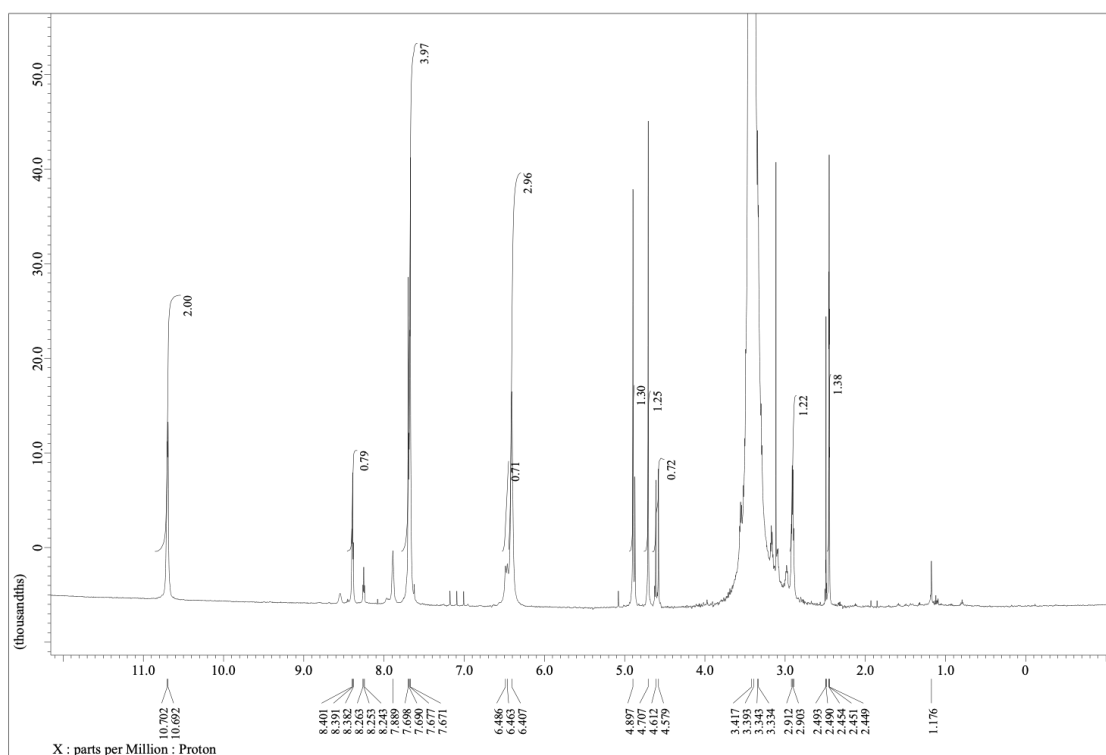

<sup>1</sup>H NMR spectrum of 26

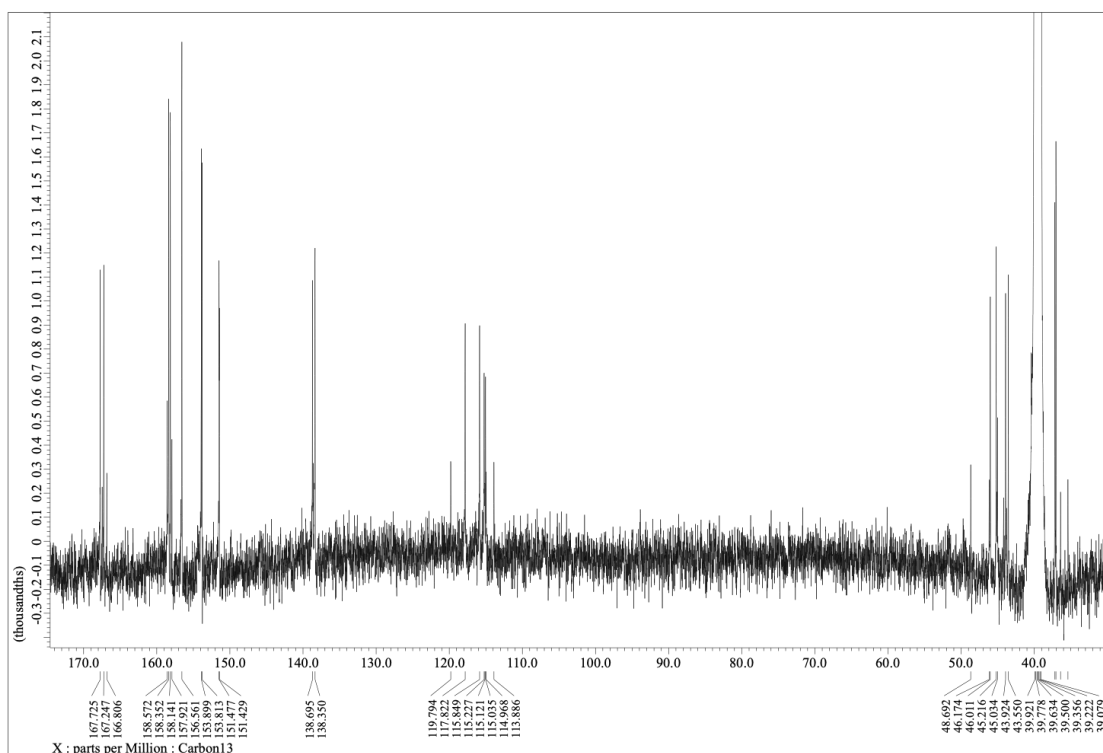

<sup>13</sup>C NMR spectrum of 26

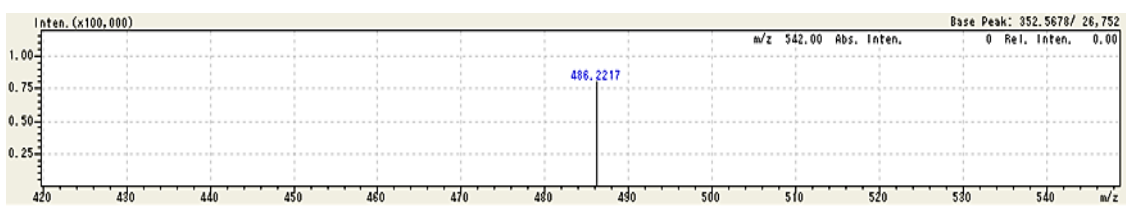

ESI-MS spectrum of **26**

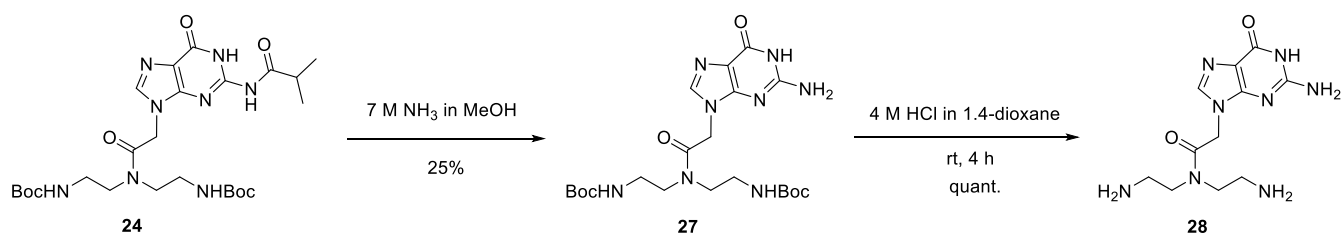

Scheme S9. Synthesis of compound **28**

**Di-tert-butyl (((2-(2-amino-6-oxo-1H-purin-9(6H)-yl)acetyl)azanediyl)bis(ethane-2,1-diyl))dicarbamate (**27**)**

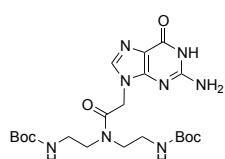

Compound **24** (72 mg, 0.13 mmol) was added  $\text{NH}_3$  in MeOH (7 M, 5 mL), stirred for 38 h at rt. The reaction mixture was concentrated under reduced pressure, dried under vacuum. The residue was purified by flash silica gel column chromatography (Yamazen inject column size: S, Yamazen Hi-flash column size: M,  $\text{CH}_2\text{Cl}_2/\text{MeOH} = 100:0$  to  $50:50$ ) to afford **27** (23.6 mg, 0.048 mmol, 37% yield) as an orange solid.

$^1\text{H}$  NMR (600 MHz,  $\text{CD}_3\text{OD}$ )  $\delta$  7.67 (s, 1H), 5.01 (s, 2H), 3.56 (t,  $J = 6.2$  Hz, 2H), 3.44 (t,  $J = 6.2$  Hz, 2H), 3.36 (t,  $J = 6.5$  Hz, 2H), 3.21 (t,  $J = 6.2$  Hz, 2H), 1.47-1.41 (m, 18H). ESI-HRMS calcd for  $\text{C}_{21}\text{H}_{35}\text{N}_8\text{O}_6$   $[\text{M}+\text{H}]^+$ :

495.2674, found: 495.2683.

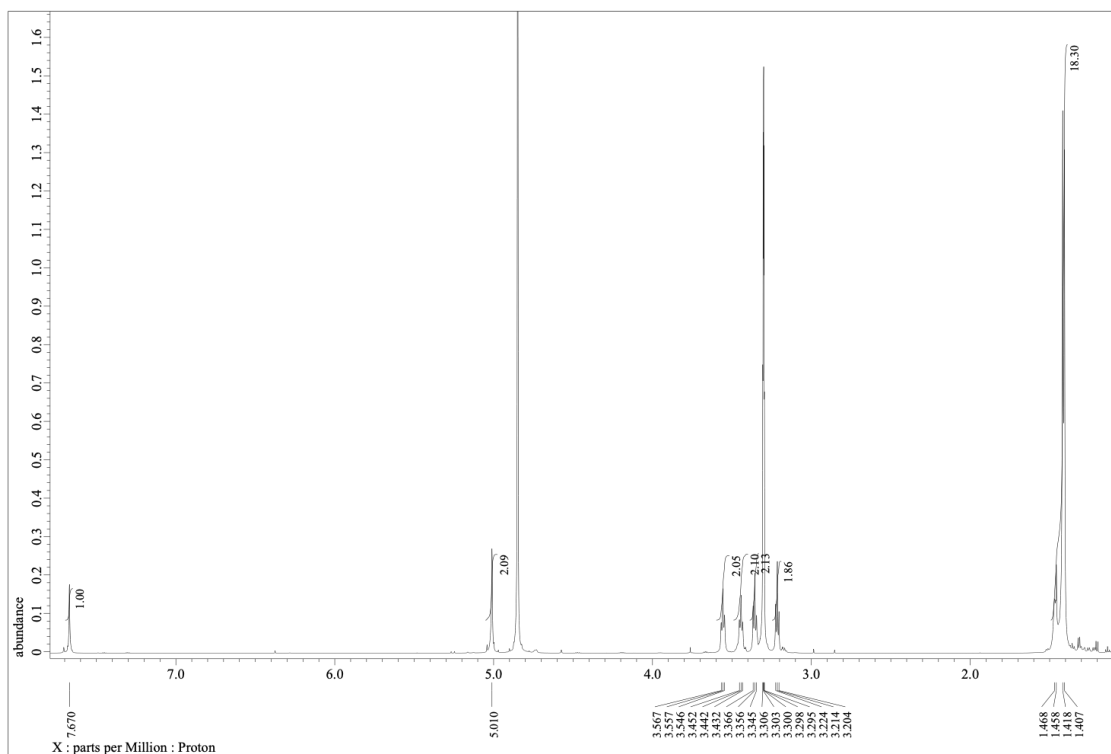

$^1\text{H}$  NMR spectrum of **27**

**2-(2-Amino-6-oxo-1H-purin-9(6H)-yl)-N,N-bis(2-aminoethyl)acetamide trihydrochloride (**28**)**

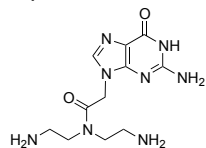

Compound **27** (24 mg, 0.049 mmol) was added HCl in 1,4-dioxane (4 M, 5 mL) and stirred for 4 h. The reaction mixture was concentrated under reduced pressure, and the residue was dried by codistillation with MeOH to afford **28** (25.3 mg, 0.069 mmol, quant.) as a pale orange solid.

$^1\text{H}$  NMR (600 MHz, DMSO- $d_6$ )  $\delta$  11.06 (s, 1H), 8.33 (s, 1H), 7.84 (s, 3H), 7.49 (s, 3H), 6.62 (s, 2H), 4.58 (s, 2H), 2.94 (t,  $J$  = 5.9 Hz, 2H), 2.81 (dt,  $J$  = 23.9, 5.3 Hz, 1H), 2.51 (d,  $J$  = 5.5 Hz, 2H), 2.31 (d,  $J$  = 5.5 Hz, 2H). ESI-MS: 294.9619  $[\text{M}+\text{H}]^+$ .

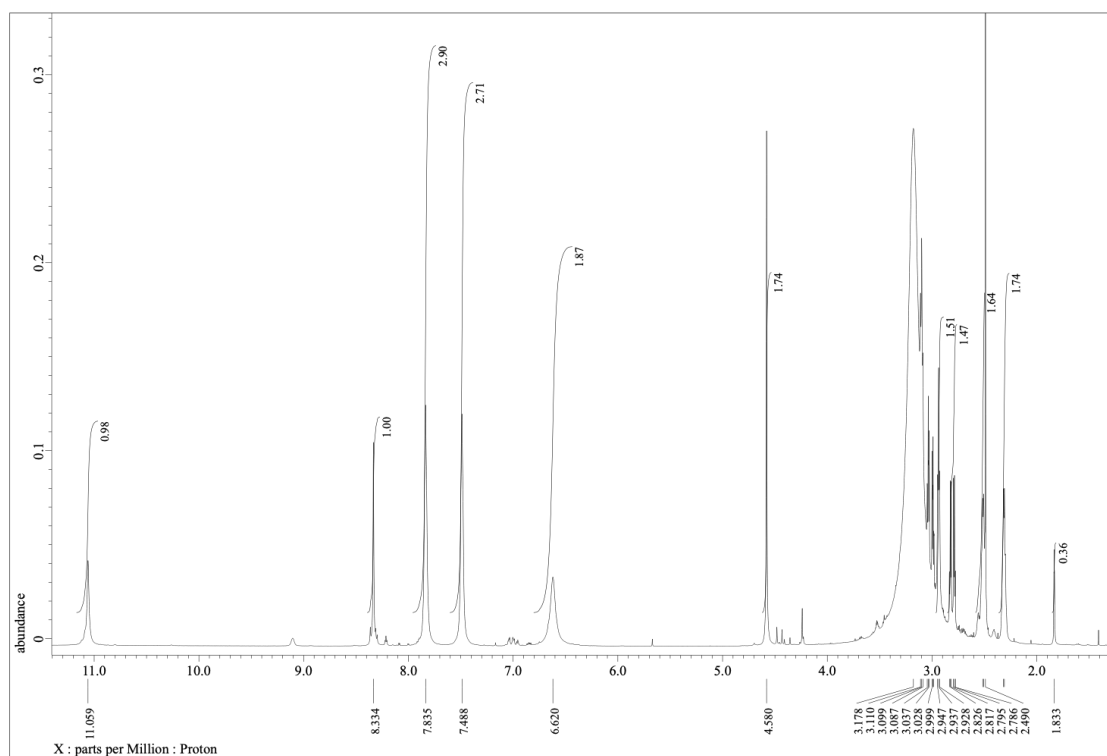

$^1\text{H}$  NMR spectrum of **28**

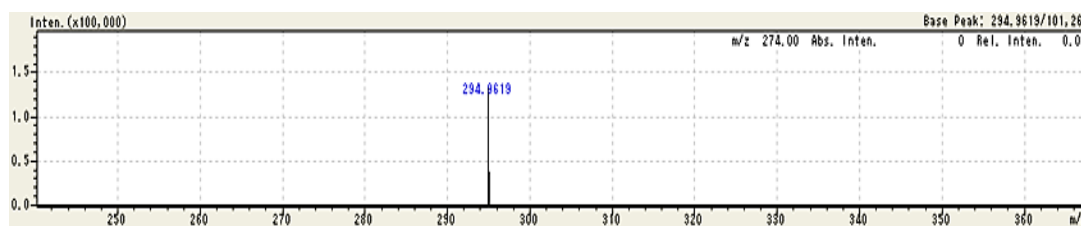

ESI-MS chromatogram of **28**

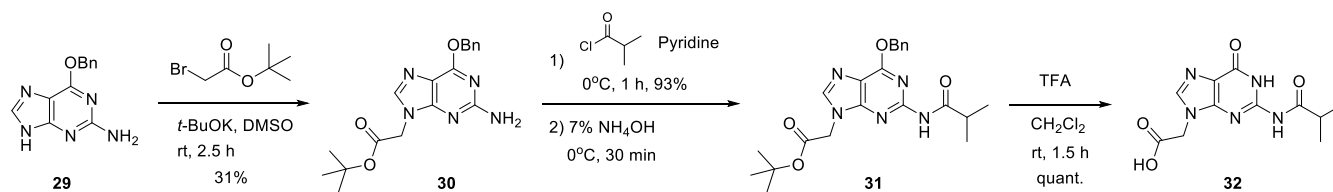

Scheme S10. Synthesis of compound **32**

***tert*-Butyl 2-(2-amino-6-(benzyloxy)-9*H*-purin-9-yl)acetate (**30**)**

2-Amino-6-benzoyloxypurine **29** (10 g, 41 mmol) was dissolved in DMSO (82 mL) and stirred at 0°C. The mixture was added *t*-BuOK (5.58 g, 1.2 eq) slowly and stirred for 30 min at 0°C. *tert*-Butyl bromoacetate (8.5 mL, 1.4 eq) was added dropwise and stirred for 1 h at rt. The reaction mixture was diluted with EtOAc, washed with sat. NH<sub>4</sub>Cl aq., H<sub>2</sub>O and brine. The organic layer was dried over Na<sub>2</sub>SO<sub>4</sub>, filtered, concentrated under reduced pressure. The residue was purified by flash silica gel column chromatography (Yamazen inject column size: 2L, Hi-flash column size: 3L, CH<sub>2</sub>Cl<sub>2</sub>/MeOH = 100:0 to 98:2) to afford **30** (4.6 g, 13 mmol, 31% yield) as a white solid.

<sup>1</sup>H NMR (600 MHz, DMSO-*d*<sub>6</sub>)  $\delta$  7.82 (s, 1H), 7.49 (d, *J* = 7.2 Hz, 2H), 7.39 (t, *J* = 7.2 Hz, 2H), 7.34 (t, *J* = 6.5 Hz, 1H), 6.50 (s, 2H), 5.49 (s, 2H), 4.79 (s, 2H), 1.40 (s, 9H). ESI-HRMS calcd for C<sub>18</sub>H<sub>22</sub>N<sub>5</sub>O<sub>3</sub> [M+H]<sup>+</sup>: 356.1717, found: 356.1733.

The position of *N*-alkylation was confirmed by 2D-NMR (HMBC) measurements (Correlation between C-4 and H-10).

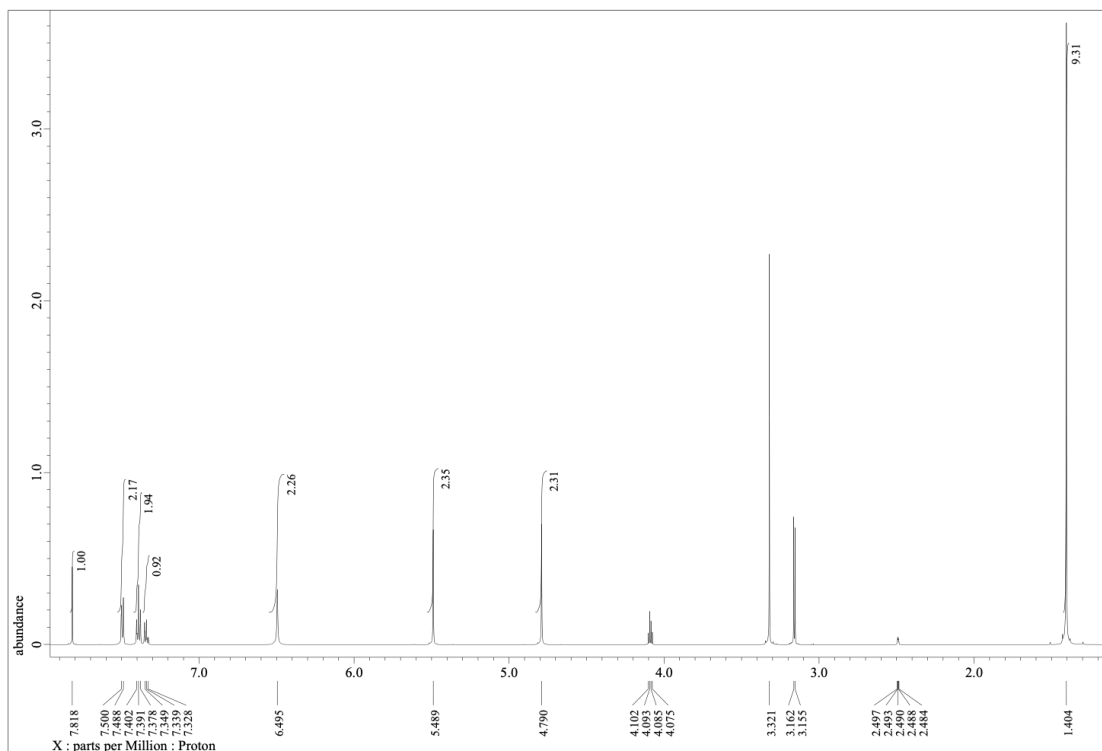

<sup>1</sup>H NMR spectrum of **30**



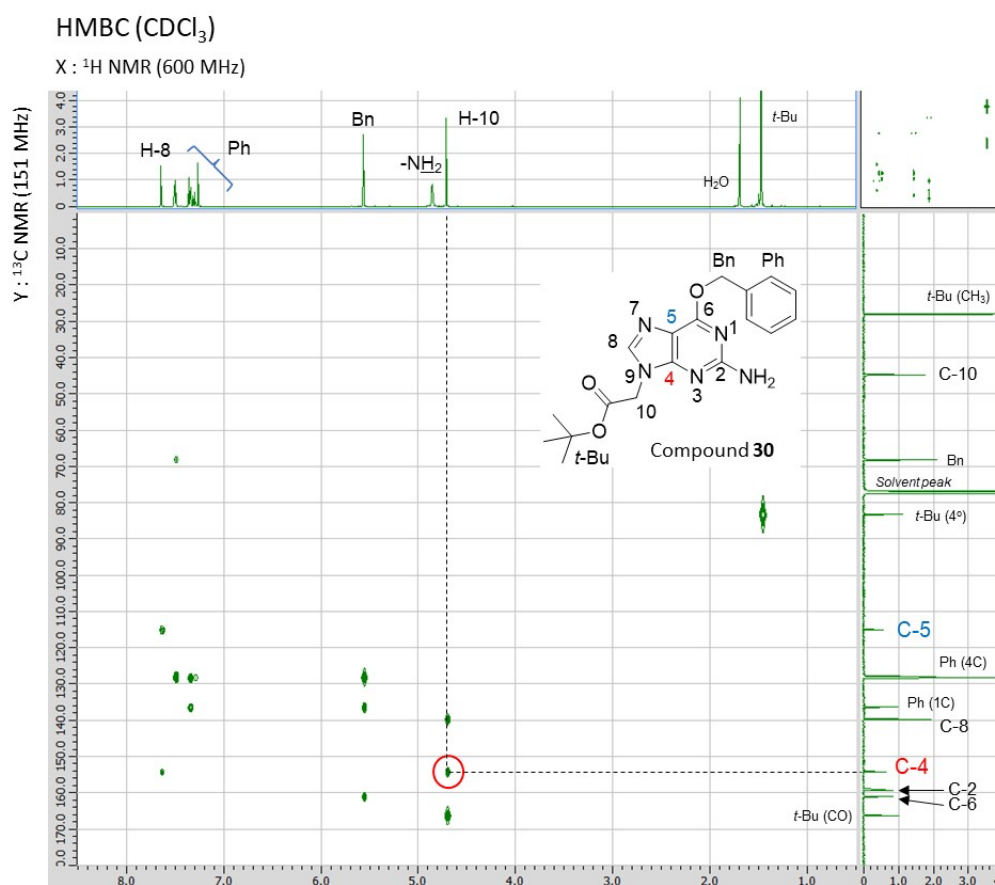

HMBC spectrum of **30**

**tert-Butyl 2-(6-(benzyloxy)-2-isobutyramido-9H-purin-9-yl)acetate (**31**)**

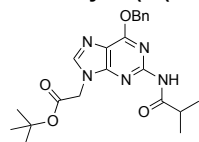

Compound **30** (4.6 g, 13 mmol) was dissolved in pyridine (65 mL) and stirred at 0°C. Isobutyryl chloride (2.7 mL, 2 eq) was added dropwise then stirred for 2 h at rt. After stirring, the reaction mixture was added isobutyryl chloride (1.4 mL, 1 eq) at 0°C, then stirred for 1 h at rt. After cooling to 0°C, the reaction mixture was added dropwise ice-cold 7% NH<sub>4</sub>OH (60 mL) over 3 min under well-stirring. The reaction mixture was kept stirring for 30 min at 0°C. The reaction mixture was diluted with EtOAc, washed with sat. NaHCO<sub>3</sub> aq. and brine. The organic layer was dried over Na<sub>2</sub>SO<sub>4</sub>, filtered, concentrated under reduced pressure, dried under vacuum to afford **31** (5.1 g, 12 mmol, 93%) as a white foam solid.

<sup>1</sup>H NMR (600 MHz, DMSO-*d*<sub>6</sub>) δ 10.38 (s, 1H), 8.18 (s, 1H), 7.56 (d, *J* = 6.9 Hz, 2H), 7.40-7.33 (m, 3H), 5.62 (s, 2H), 4.94 (s, 2H), 3.16 (d, *J* = 4.8 Hz, 1H), 2.96-2.91 (quint., *J* = 6.8 Hz, 1H), 1.41 (s, 9H), 1.08 (d, *J* = 6.9 Hz, 6H), 0.97 (d, *J* = 6.9 Hz, 1H). ESI-HRMS calcd for C<sub>22</sub>H<sub>28</sub>N<sub>5</sub>O<sub>4</sub> [M+H]<sup>+</sup>: 426.2136, found: 426.2144.

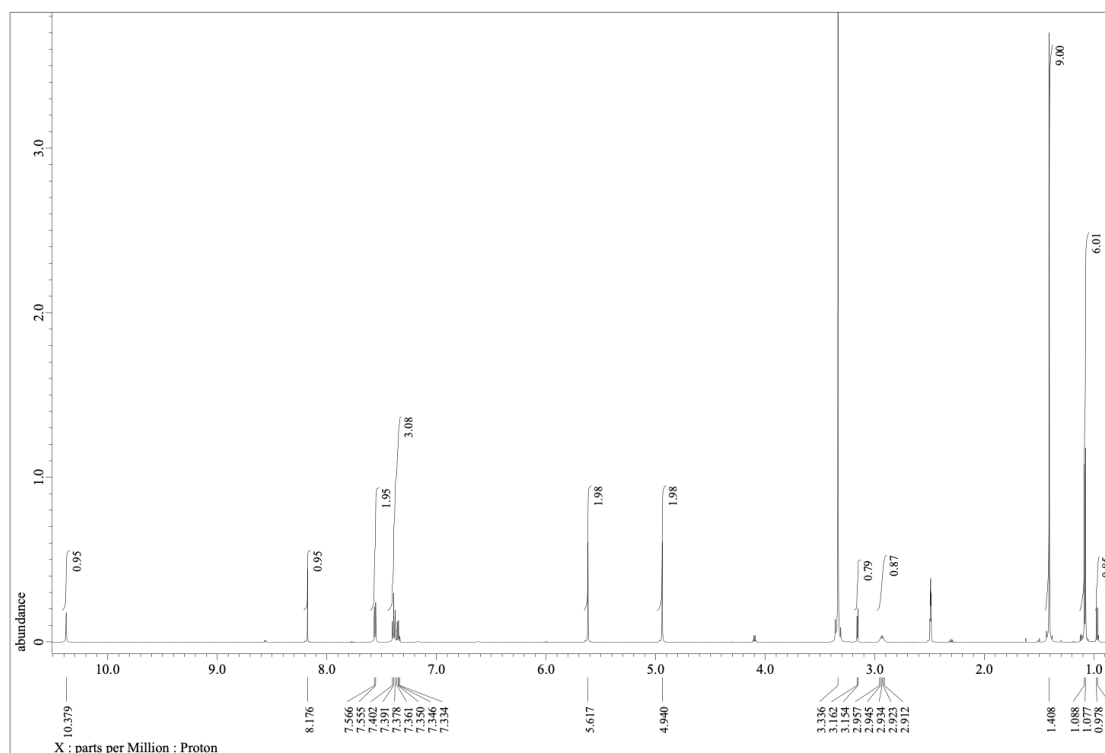

<sup>1</sup>H NMR spectrum of **31**

### 2-(2-Isobutyramido-6-oxo-1*H*-purin-9(6*H*)-yl)acetic acid (**32**)

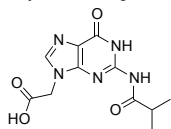

Compound **31** (5.1 g, 12 mmol) was dissolved in CH<sub>2</sub>Cl<sub>2</sub> (10 mL) and TFA (40 mL) then stirred for 2 h at rt. The reaction mixture was diluted with toluene, concentrated under reduced pressure to remove the volatiles. The residue was added Et<sub>2</sub>O, and triturated to solidify. The resulting precipitate was collected by filtration, washed with Et<sub>2</sub>O, dried under vacuum to afford **32** (3.9 g, 14 mmol, quant.) as a white powder.

<sup>1</sup>H NMR (600 MHz, DMSO-*d*<sub>6</sub>) δ 12.08 (s, 1H), 11.66 (s, 1H), 7.95 (s, 1H), 4.89 (s, 2H), 2.78-2.73 (sept., *J* = 6.9 Hz, 1H), 1.10 (d, *J* = 6.9 Hz, 6H). ESI-HRMS calcd for C<sub>11</sub>H<sub>14</sub>N<sub>5</sub>O<sub>4</sub> [M+H]<sup>+</sup>: 280.1040, found: 280.1040.

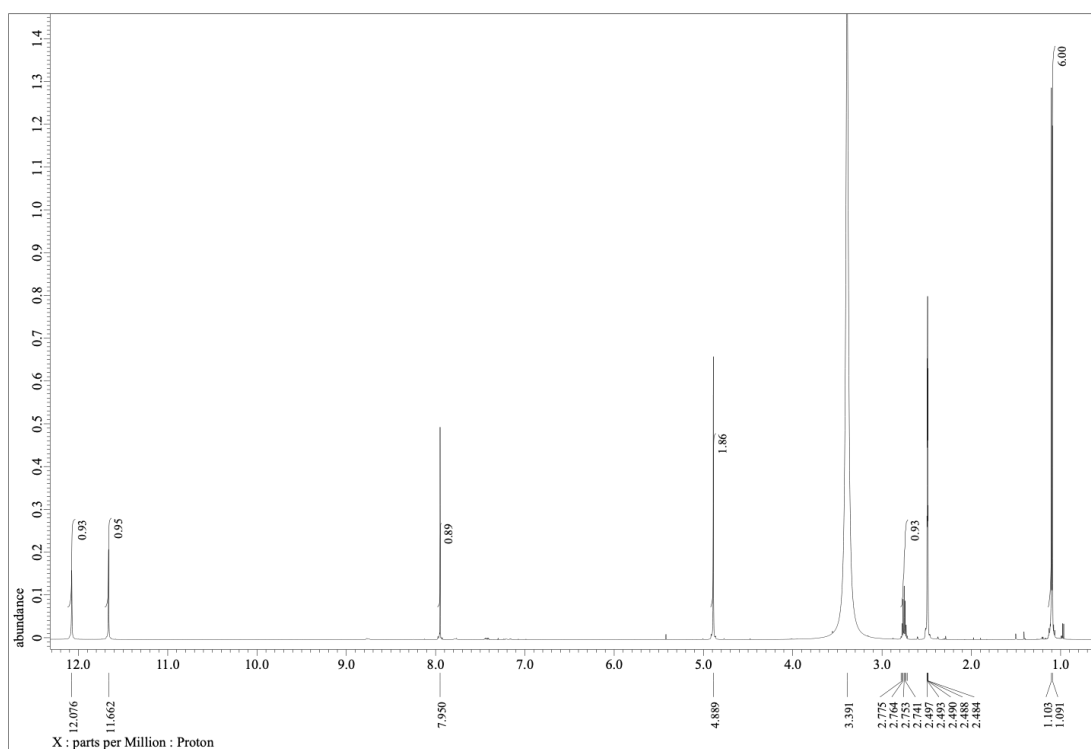

$^1\text{H}$  NMR spectrum of **32**

## References

- [S1] K. Ikeda, Y. Yanase, K. Hayashi, Y. Hara-Kudo, G. Tsuji, and Y. Demizu, *Bioorg. Med. Chem. Lett.* **2021**, 32, 127713, DOI: 10.1016/j.bmcl.2020.127713.
- [S2] Y. Yang, X. Wu, N. Busschaert, H. Furuta, P. A Gale, *Chem. Commun.* **2017**, 53, 9230-9233, DOI: 10.1039/c7cc04912a.
- [S3] D. D. N'Da, E. Neuse, M. Nell, C. E. J. van Rensburg, *S. Afr. J. Chem.* **2003**, 59, 33-42.
